# Supplementary material for: Precipitation of dolomite from seawater on a Carnian coastal plain (Dolomites, northern Italy): evidence from carbonate petrography and Sr-isotopes
Source: Copernicus journal article supplement (doi:10.5194/se-2019-34), 2019-03-04
Supplement: Supplementary file [file se-2019-34-RC2-supplement.pdf]

1 **Precipitation of dolomite from seawater on a Carnian coastal plain (Dolomites, northern**  
2 **Italy): evidence from carbonate petrography and Sr-isotopes**

3 Maximilian Rieder<sup>1</sup>, Wencke Wegner<sup>2</sup>, Monika Horschinegg<sup>2</sup>, Stephanie Klackl<sup>1</sup>, Nereo  
4 Preto<sup>3</sup>, Anna Breda<sup>3</sup>, Susanne Gier<sup>1</sup>, Urs Klötzli<sup>2</sup>, Stefano M. Bernasconi<sup>4</sup>, Gernot Arp<sup>5</sup>,  
5 Patrick Meister<sup>1</sup>

6 <sup>1</sup> Department of Geodynamics and Sedimentology, University of Vienna, Althanstr. 14, 1090 Vienna, Austria

7 <sup>2</sup> Department of Lithospheric Research, University of Vienna, Althanstr. 14, 1090 Vienna, Austria

8 <sup>3</sup> Department of Geosciences, University of Padova, Via Gradenigo 6, 35131 Padova, Italy

9 <sup>4</sup> Geological Institute, ETH Zürich, Sonneggstr. 5, 8092 Zürich, Switzerland

10 <sup>5</sup> Geoscience Centre, University of Göttingen, Goldschmidtstr. 3, 37077 Göttingen, Germany

11 Correspondence: Patrick Meister (patrick.meister@univie.ac.at)

12

13 **Abstract.** The geochemical conditions conducive to dolomite formation in shallow evaporitic  
14 environments along the Triassic Tethyan margin are still poorly understood. Most of the  
15 Triassic dolomites in the Austroalpine and the South Alpine realm are affected by late  
16 diagenetic or hydrothermal overprinting, but recent studies from the Carnian Travenanzes  
17 Formation (South Alpine) provide evidence of primary dolomite. Here a petrographic and  
18 geochemical study of ~~the~~ dolomites intercalated in a 100-m-thick Carnian sequence of distal  
19 alluvial plain deposits is presented to gain better insight into the conditions and processes of  
20 dolomite formation. The dolomites occur as 10- to 50-cm-thick homogenous beds, mm-scale  
21 laminated beds and nodules associated with palaeosols. The dolomite is nearly stoichiometric  
22 with slightly attenuated c-reflections. Sedimentary structures indicate that the initial primary  
23 dolomite or precursor phase consisted largely of unlithified mud. Strontium isotope ratios  
24 (<sup>87</sup>Sr/<sup>86</sup>Sr) of homogeneous and laminated dolomites reflect Triassic seawater, suggesting  
25 precipitation in evaporating seawater in a coastal ephemeral lake or sabkha system. However,  
26 the setting differed from modern sabkha or coastal ephemeral lake systems by seasonally wet  
27 conditions with a significant siliciclastic input and inhibition of significant lateral groundwater

28 flow through impermeable clay deposits, thus representing a non-actualistic system in which  
29 dolomite formed ~~along the ancient Tethyan margin.~~

30

31 **Keywords** Dolomite, Sr-isotopes, sabkha, alluvial plain, peritidal platform, Travenanzes  
32 Formation, ephemeral lake, authigenic carbonate.

33

34

### 35 **1 Introduction**

36 The formation of dolomite [CaMg(CO<sub>3</sub>)<sub>2</sub>] under Earth surface conditions in modern and  
37 ancient environments is still a major unsolved problem in sedimentary geology. Dolomite  
38 does not precipitate from modern open ocean water, apparently, because its nucleation and  
39 growth is inhibited by a high kinetic barrier. For the same reason, its precipitation under  
40 laboratory conditions has been difficult (cf. Land, 1998), and therefore the factors that may  
41 have influenced dolomite formation through Earth history, ~~giving rise to a significant part of~~  
42 ~~the sedimentary record,~~ also remain poorly constrained. Van Tuyl (1916) discussed several  
43 competing theories, one of which was the chemical theory, where dolomite is a primary  
44 precipitate, ~~hence,~~ forming as a result of ~~the conditions~~ prevailing in the depositional  
45 environment. In contrast, stable isotope and fluid inclusion data often indicate that massive  
46 dolomites formed due to replacement of precursor calcium carbonate during burial diagenesis,  
47 i.e., at higher temperature and under conditions decoupled from the ancient depositional  
48 environment. Chilingar (1965) suggested that the portion of dolomite in carbonates increases  
49 with geological age, implying a replacement during burial. However, burial dolomitization  
50 requires a mechanism pumping large volumes of Mg-rich water through porous rock (Machel,  
51 2004) and is not always a viable process. There is evidence that ~~at certain times in Earth's~~  
52 ~~history,~~ large amounts of dolomite could have formed under near-surface conditions  
53 (penecontemporaneous dolomite), and several studies linked the abundance of dolomite to

## Sr-isotopes in Carnian primary dolomite

54 secular variations in seawater chemistry, with ~~preferred dolomite formation~~ during times of  
55 "calcite seas" (Given and Wilkinson, 1987; Warren, 2000; Burns et al., 2000).

56 In the Tethyan realm, penecontemporaneous dolomite formation seems to have prevailed  
57 during the Triassic (Meister et al., 2013, and references therein), in an "aragonite sea", while  
58 elsewhere dolomite was not particularly abundant (cf. Given and Wilkinson, 1987). In Norian  
59 shallow water dolomites of the Dolomia Principale, Iannace and Frisia (1994) measured  
60 oxygen isotope values as positive as +3.5‰, suggesting ~~a~~ formation at Earth surface  
61 temperatures, whereas dolomites ~~of~~ the overlying ~~early~~ Jurassic units typically show  
62 signatures of burial diagenetic overprint. Frisia et al. (1994) interpreted these dolomites to be  
63 an early diagenetic replacement of precursor carbonate. In a recent study, Preto et al. (2015)  
64 suggested that the dolomites of the Carnian Travenanzes Formation (Fm.) in the Venetian  
65 Alps are primary precipitates, i.e. they precipitated directly from ~~a~~ solution in the sedimentary  
66 environment and not by ~~replacement~~ of a precursor phase during burial. This interpretation is  
67 based on high-resolution transmission electron microscope (HR-TEM) analysis showing  
68 nanometre-sized crystal aggregates within single micron-scale dolomite crystals. The nano-  
69 crystal structures were not replaced by any of the dolomite phases described by Frisia and  
70 Wenk (1993) in Late Triassic dolomites of the Southern Alps, ~~and they show similarity~~ to  
71 dislocation-ridden Mg-rich phases observed in ~~modern sabkha dolomite~~ and ~~interpreted~~ as  
72 primary (Frisia and Wenk, 1993). This finding is intriguing, not only because it is consistent  
73 with primary dolomite formation ~~already discussed~~ by Van Tuyl (1916) and observed in many  
74 modern environments (e.g., Sabkha of Abu Dhabi: Illing, 1965; Wenk et al., 1993; unlithified  
75 dolomite is also mentioned in Bontognali et al., 2010; and Court et al., 2017; Deep Springs  
76 Lake, California: Jones, 1965; Clayton et al., 1968; Meister et al., 2011; Coorong Lakes: Von  
77 der Borch, 1976, Rosen et al., 1989, Warren et al., 1990; Brejo do Espinho, Brazil; Sánchez-  
78 Román et al., 2009; Lake Acigöl, Turkey: Balci et al., 2016; Lake Neusiedl, Austria:  
79 Neuhuber et al., 2015; Lake Van: McCormack et al., 2018), but it also provides a window into

80 ancient primary dolomite formation pathways. This finding is also consistent with recent  
81 experiments by Rodriguez-Blanco et al. (2015), demonstrating a nano-crystalline pathway of  
82 dolomite nucleation and growth. Critically, nanometre size nuclei show a different surface  
83 energy landscape compared to macroscopic crystals, allowing for potentially lower energy  
84 barriers, perhaps modified by organic matter, microbial effects, clay minerals or particular  
85 water chemistry, and thus, promoting a spontaneous precipitation of dolomite.

86 The interpretation of primary dolomite in the Travenanzes Fm. needs further validation by  
87 nano- and atomic scale analyses and further petrographic and geochemical investigations to  
88 establish the environmental and geochemical conditions on this Carnian platform. In  
89 particular, the origin of ionic solutions conducive to dolomite formation is still unclear.  
90 Comparison with modern environments shows that ionic solutions may either be seawater-  
91 derived, as shown for the sabkhas along the Persian Gulf coast, where several hydrological  
92 mechanisms were discussed (Adams and Rhodes, 1960; Hsü and Siegenthaler, 1969;  
93 McKenzie et al., 1980, McKenzie, 1981; see Machel, 2004, for an overview; cf. also Teal et  
94 al., 2000), or derived from continental groundwater, as shown for the coastal ephemeral lakes  
95 of the Coorong area (Australia; Alderman and Skinner, 1957; Von der Borch et al., 1976,  
96 Rosen et al., 1989; Warren et al., 1990). While both types of fluid become concentrated  
97 during evaporation and, perhaps, modified by the precipitation of carbonates and evaporites,  
98 ~~giving rise to abundant dolomite formation,~~ it remains unclear which mechanism prevailed on  
99 the Carnian platform.

100 The Travenanzes Fm. differs from ~~these potential~~ modern analogues in its large amounts of  
101 clay. ~~In fact,~~ dolomites occur in the Travenanzes Fm. as ~~beds~~ intercalated in a 100-m-thick  
102 sequence of red clay, deposited on a distal alluvial plain, presumably under seasonally wet  
103 conditions. This facies shows, except for the horizons containing marine fossils, striking  
104 similarity to a Germanic Keuper facies, which represents an extended and entirely continental  
105 playa lake system, also showing intercalations of primary dolomite in red clay (Reinhardt and

106 Ricken, 2000). Although the Travenanzes Fm. is clearly located, palaeogeographically, in the  
107 Tethyan depositional region (Breda and Preto, 2011), its facies separation from a Germanic  
108 Keuper facies may not be precisely coincident with palaeogeographic features, such as the  
109 Vindelician high zone. We suggest that the composition and origin of ionic solutions  
110 conducive to primary dolomite formation, either from continental water or seawater, is also an  
111 indicator for the palaeogeographic separation between the two facies zones.

112 Here we provide a detailed investigation of dolomites of the Travenanzes Fm. to  
113 reconstruct the processes and factors conducive to dolomite formation. We specifically  
114 searched for sedimentary structures indicating that the initially deposited authigenic carbonate  
115 was still unlithified, as it would be expected if it spontaneously precipitated from the shallow  
116 water bodies of ephemeral lakes or tidal ponds. Radiogenic Sr isotope ratios ( $^{87}\text{Sr}/^{86}\text{Sr}$ ) were  
117 measured in the dolomites and compared with the known Triassic seawater Sr-isotope curve  
118 (Veizer et al., 1999; McArthur et al., 2012) to determine if the ionic solutions conducive to  
119 dolomite formation are derived from seawater or from continental runoff. Values were also  
120 compared to dolomites from modern environments and to dolomites of clear continental  
121 origin from the Germanic Keuper. Based on the new insights we discuss possible scenarios of  
122 dolomite formation that could have prevailed along the Triassic western Tethys margins and  
123 in similar evaporative environments.

124

## 125 **2 Geological setting**

126 The Dolomite mountains (Southern Tyrol and Venetian Alps; Fig. 1a) are well known for  
127 their characteristic peaks consisting of Triassic carbonate platform limestones and dolomites.  
128 These platforms developed all along the margins of the western Tethys ocean (Stampfli and  
129 Borel, 2002), and are separated by deep basins in the middle Triassic and form an extended  
130 coastal plain during the Carnian and Norian. The Adriatic plate rotated by almost 90° counter  
131 clockwise during alpine orogeny (Ratschbacher et al., 1991; Handy et al., 2010). As a result,

132 ~~the~~ deep-water environments are found to the north ~~in today's tectonic position~~ although they  
133 were originally located to the east (Fig. 1a). ~~In the Dolomites, the~~ Triassic paleogeography  
134 ~~was~~ largely preserved in spite of Alpine deformation because the Dolomites form a ca. 60 km  
135 wide pop-up structure bound by the ~~periadriatic~~ line to the north and northwest and the  
136 Valsugana ~~fault~~ to the southeast (Fig. 1a, inset). Therefore, the Dolomites were never buried  
137 to ~~greater depth~~ and ~~have~~ not experienced ~~a~~ metamorphic overprint (Doglioni, 1987). The  
138 colour alteration index of conodonts in the Heiligkreuz Fm., ~~underlying~~ the Travenanzes Fm.  
139 in this region, is 1, suggesting maximum burial temperatures of less than 50°C which are  
140 confirmed by biomarker data (Dal Corso et al., 2012).

141 The Travenanzes Fm. lies unconformably above the Heiligkreuz Fm., and is overlain by  
142 the Dolomia Principale (Hauptdolomit) ~~with~~ a transgressive boundary (Fig. 1b). ~~Presumably~~  
143 ~~as a result of a change in climate and increasing humid episodes during the Carnian, large~~  
144 amounts of siliciclastic material were deposited, ~~entirely~~ filling ~~the~~ more than 100 m deep  
145 ~~basins~~ between the carbonate platforms of the Cassian dolomite (Gattolin et al., 2013; 2015).  
146 These basin-filling deposits form a coastal succession or mixed carbonate-siliciclastic ramp,  
147 ~~including~~ large clinofolds ~~with~~ sandstones and conglomerates (Heiligkreuz Fm.; see Preto  
148 and Hinnov, 2003; Gattolin et al., 2013; 2015). The overlying Travenanzes Fm. was deposited  
149 on an extremely flat topography, as it consists of ca. 100-m-thick red and green claystone with  
150 intercalated dolomites, evaporites and siliciclastic beds (Fig. 2; Kraus, 1969; Breda and Preto,  
151 2011). ~~In a south-north transect,~~ it shows a typical interfingering between alluvial deposits  
152 ~~with~~ conglomerates and sandstones to the south and ~~a~~ carbonate-dominated peritidal to sabkha  
153 facies to the north (Breda and Preto, 2011). The upper boundary to the Dolomia Principale is  
154 time-transgressive, i.e., it becomes younger from north to south. The Travenanzes Fm.  
155 consists of three transgressive-regressive cycles, with the highstand deposits showing  
156 identical peritidal carbonate facies as the Dolomia Principale (Breda and Preto, 2011). The

157 boundary to the Dolomia Principale is defined by the last occurrence of siliciclastic material  
158 (Gianolla et al., 1998).

159 The depositional environment of the siliciclastic facies in the Travenanzes Fm. has been  
160 interpreted as a dryland-river system by Breda and Preto (2011). Such a system occurs in arid  
161 environments if rivers drain into a coastal alluvial plain, but do not reach the coast.  
162 Evaporation along the way may lead to the formation of playa lakes, ~~whereas~~ on the seaward  
163 side extended evaporative tidal areas, i.e., sabkhas, develop. Both types of environment are  
164 well known for giving rise to modern dolomite formation (see references above). As the  
165 Southern Alps were located in tropical latitudes, a warm arid climate, perhaps influenced by a  
166 monsoon effect, had developed (Muttoni et al., 2003). Rivers provided large amounts of clay,  
167 becoming partially oxidized under subaerial conditions, a typical red and green clay  
168 succession containing palaeosols developed.

169 This facies is widespread throughout the Alpine and Tethyan realm during the Carnian, but  
170 ~~the same~~ deposits are strongly deformed by alpine tectonics in most Austroalpine units,  
171 forming a characteristic band of rauhwacke, the “Raibl beds” (e.g., Czurda and Nicklas,  
172 1970). In the Travenanzes Fm. the entire sequence still shows its depositional architecture,  
173 providing a pristine archive to study the ~~diverse~~ intercalated dolomites.

174 The Carnian and Norian deposits of the Keuper in the endorheic Germanic Basin show a  
175 similar facies as the Travenanzes Formation. The Germanic deposits are described in more  
176 detail by Reinhardt and Ricken (2000; and references therein), and they clearly represent  
177 continental playa lake deposits. Here they are only included for comparison with the  
178 Travenanzes Formation.

179

## 180 **3 Methods**

### 181 **3.1 Petrographic and mineralogical analysis**

## Sr-isotopes in Carnian primary dolomite

182 A total of 39 hand specimens were collected from the stratigraphic section at Rifugio  
183 Dibona, 5 km west of Cortina d'Ampezzo (46.532727N/12.067161E; Fig. 1; Breda and Preto,  
184 2011). Additional samples of Triassic dolomites from the Germanic Basin (Weser Fm. and  
185 Arnstadt Fm. near Göttingen, Northern Germany) and modern dolomite from the Coorong  
186 Lagoon (South Australia) and Deep Springs Lake (California) were also analysed for  
187 comparison. Polished thin sections were carbon coated for analysis under the scanning  
188 electron microscope (SEM) using a FEI Inspect S-50 SEM (Thermo Fisher Scientific,  
189 Bremen, Germany). Element contents were determined semi-quantitatively using an EDX  
190 detector (EDAX Ametek, New Jersey, United States) under high vacuum, a spot size 5.0 and  
191 12.5 kV beam voltage at a working distance of 10 mm. Differences in mineralogy at the  
192 micron scale were mapped in backscatter mode with high contrast.

193 For bulk mineralogical analysis, three dolomite samples were milled with a disk mill. Clay  
194 mineralogy was determined on 40 g aliquots that were leached two times for 24 h in 250 ml of  
195 25% acetic acid to dissolve all carbonate (Hill and Evans, 1965). The clay mineral separates  
196 were washed three times with H<sub>2</sub>O and centrifuged. The grain size fraction <2 µm was  
197 collected by sedimentation in an Atterberg cylinder after 24 h 33 min. Oriented samples were  
198 prepared by pipetting the suspensions (10 mg clay/ml) on glass slides and analysed after air  
199 drying. To identify expandable clay minerals, the samples were additionally saturated with  
200 ethylene-glycol and heated to 550°C (Moore and Reynolds, 1997). X-ray diffraction analysis  
201 of bulk samples and clay mineral separates was performed with a PANalytical X'Pert Pro  
202 diffractometer using CuKα radiation with 40 kV and 40 mA. The samples were scanned from  
203 1.76° to 70° 2θ with a step size of 0.0167° and 5 s per step. The X-ray diffraction patterns  
204 were interpreted using the Panalytical software "X'Pert High score plus" and Moore and  
205 Reynolds (1997) for the clay minerals.

206 Total organic carbon (TOC) and total inorganic carbon (TIC) contents were determined for  
207 seven samples of pure claystone, not containing any dolomite layers or nodules. This material



208 was used as carbonate-free control for acid leaching experiments as explained below. Ca. 0.2  
209 g of dry sample powder was measured in a LECO RC-612 multiphase carbon analyser, at the  
210 Department of Environmental Geosciences at the University of Vienna, with a temperature  
211 ramp of 70°C per min to a maximum temperature of 1000°C.

212

### 213 **3.2 Carbon and oxygen isotope analysis**

214 Carbon and oxygen isotopes were measured on 28 samples which were micro-drilled  
215 from thin section cuttings (see below). The samples were analysed with a Delta V Plus mass  
216 spectrometer coupled to a GasBench II (Thermo Fisher Scientific, Bremen, Germany) at ~~the~~  
217 ETH Zürich (Zürich, Switzerland) following the procedure described in Breitenbach and  
218 Bernasconi (2011). The precision was better than 0.1‰ for both isotopes. The oxygen isotope  
219 values were corrected for kinetic fractionation during dissolution of dolomite in anhydrous  
220 phosphoric acid at 70°C, using a fractionation factor of 1.009926 (Rosenbaum and Sheppard,  
221 1986).

222

### 223 **3.3 Element analysis**

224 Total element concentrations were measured in leachates of the same three dolomite  
225 specimen analysed by XRD and two claystones with the lowest inorganic carbon content. The  
226 purpose of these measurements was to test the efficiency of the sequential extraction  
227 procedure used for Sr-isotope analysis, and to determine potential origins of the Sr. The  
228 samples were homogenized in an agate pestle and mortar and 100 mg of the homogenized  
229 powder were weighed into centrifuge tubes. The samples were reacted in 10 ml 0.1 N acetic  
230 acid and placed on a shaker for two days. The sample was centrifuged and the supernatant  
231 was stored separately. The leaching step was repeated with 10 ml of 1 N acetic acid. Five ml  
232 of each fraction were used for element concentration analysis (the rest was further processed  
233 for Sr-isotope analysis; see below). The solutions were evaporated on a heating plate and the

## Sr-isotopes in Carnian primary dolomite

234 residues were redissolved in 5 ml 2.5 N HNO<sub>3</sub>. This step was repeated with 5 ml 5% HNO<sub>3</sub>.  
235 Concentrations were measured with a Perkin Elmer 5300 DV ICP-OES at the Department for  
236 Environmental Geosciences (University of Vienna). Detection limits for the different  
237 elements in rock (μmol/g) were: Al: 0.185, Ca: 0.025, Fe: 0.090, K: 0.026, Mg: 0.041, Mn:  
238 0.002, Na: 0.004, P: 0.032, Ti: 0.002, Ba: 0.001, Sr: 0.001 and Rb: 0.012. The precision of the  
239 measurements (relative standard deviation; RSD) for ~~the elements~~ Al, Ca, K, Mg, Ti, Ba and  
240 Sr was ≤0.9% and for ~~the elements~~ Fe, Mn, Na, Rb, P ~~it~~ was ≤6.8%.

241

### 242 3.4 Radiogenic Sr-isotope analysis

243 To ensure that Sr from the pure dolomite phase is extracted, specific areas free of clay  
244 minerals were ~~recognized~~ by SEM and identified using an Olympus SZ61 microscope  
245 equipped with a MicroMill sampling system (Electro Scientific Industries). Eleven samples  
246 were drilled over ~~a square~~ area of 5-10 mm<sup>2</sup>, or along a line in laminated rocks, to a depth of  
247 350 μm. To prevent the powder from being ~~blown away~~, the samples were drilled within a  
248 drop of MilliQ-H<sub>2</sub>O, and the suspension was transferred to a centrifuge tube using a pipette.  
249 ~~Also~~ bulk samples, clay samples, pure celestine and barite purchased from W. Niemetz  
250 (Servitengasse 12, 1090 Vienna, Austria), pure dolomite powder from Alfa Aesar (Thermo  
251 Fisher – Kandel – GmbH, Postfach 11 07 65, 76057 Karlsruhe, Germany) and a fragment of a  
252 single dolomite crystal were analysed as controls. They were crushed to a powder in an agate  
253 mortar and pestle. Dolomite, barite, and celestine were mixed in a similar ratio as they occur  
254 in the dolomites of the Travenanzes Fm. and run through the entire procedure as a control of  
255 extraction efficiency. 14 mg of rock powder was weighed out for isotope analysis.

256 ~~As additional precaution to extract the most pure dolomite phase for Sr isotope analysis, a~~  
257 sequential extraction was used. The extractions were routinely performed in 2 ml or 15 ml  
258 polypropylene tubes ~~with cap~~ at room temperature on a shaker for 10 min to 24 h. The  
259 following leaching reagents (always 2 ml) were used: 1 M NaCl, 3.3 M KCl, 0.1 N acetic

260 acid, 1 N acetic acid and 6 N HCl. Each reaction step was repeated once, and the residues  
261 were washed with 2 ml of MilliQ H<sub>2</sub>O after each step to remove remains of the previous  
262 solvent.

263 Sr was separated from interfering ions (e.g. Fe, K, Rb and Ca) using an ion exchange  
264 column packed with BIO RAD AG 50W-X8 resin (200-400 mesh, hydrogen form). Leachates  
265 were evaporated, dissolved in 6 N HCl and 2.5 N HCl and loaded to the column in 2 ml 2.5 N  
266 HCl. Then 51 ml of 2.5 N HCl were run through the column to wash out the interfering ions.  
267 ~~The~~ Sr was eluted with a further 7 ml 2.5 N HCl and dried after collection. Total procedural  
268 blanks for Sr were <1 ng and were taken as negligible (the amounts of strontium in the  
269 samples were always higher than 100 ng).

270 The isotopic composition of Sr was measured with a Triton (Thermo Finnigan) thermal  
271 ionisation mass spectrometer. Sr fractions were loaded (dissolved in 1 µl H<sub>2</sub>O) as chlorides  
272 and vaporized from a Re double filament. The double filament configuration was used to  
273 accelerate detachment of ~~the~~ Sr from the filament. The cup configuration was calibrated such  
274 that masses 84, 85 (centre cup), 86, 87 and 88 are detected. The NBS987 Sr isotope standard  
275 (number of replicates = 40) shows a <sup>87</sup>Sr/<sup>86</sup>Sr-ratio of 0.710272 ±0.000004 during the time of  
276 investigation, with the uncertainty of the Sr isotope ratios quoted as 2σ. Interference with <sup>87</sup>Rb  
277 was corrected using a <sup>87</sup>Rb/<sup>85</sup>Rb ratio of 0.386. Within-run mass fractionation was corrected  
278 for <sup>86</sup>Sr/<sup>88</sup>Sr = 0.1194.

279

## 280 **4 Results**

### 281 **4.1 Petrographic description of dolomites**

282 Fig. 2 shows the distribution of the different types of dolomite through the 100-m-thick  
283 lower, clay-rich interval of the Travenanzes Fm., above which the facies switches sharply to  
284 massive bedded dolomites similar to those of the overlying Dolomia Principale.  
285 Macroscopically three types of dolomite can be distinguished: homogeneously bedded

286 dolomite, laminated dolomite, and nodular dolomite (Fig. 3a-c). The lower and middle part of  
287 the clay-rich ~~series harbours~~ mainly homogeneous dolomite beds in red clay. Between 40 and  
288 70 m several horizons with gypsum nodules occur (Fig. 3d). A 30-cm-thick fluvial  
289 conglomerate with dolomite-cemented quartzarenites and pebbles of ripped up micritic  
290 carbonate occurs at 75 m (Fig. 3e), above which palaeosols with dm-scale vertical pedes,  
291 possible root traces showing green reduction haloes, and nodular dolomite (calcic vertisols;  
292 cf. Cleveland et al., 2008), are more frequent (e.g., Fig. 3b). Tempestite beds with  
293 megalodonts, foraminifers and ostracods occur at 65 and 89 m. A pronounced transition  
294 occurs in the uppermost ca. 8 metres of the clay-rich interval (Fig. 2b), where the clay entirely  
295 changes from red to grey colour (Fig. 2c), and laminated dolomites become predominant  
296 while evaporites and palaeosols are absent. The laminated dolomites (Fig. 3c) and cm- to dm-  
297 scale dolomite-clay interlayers show intense slumping and soft sediment deformation and  
298 pseudo-teepee structures (Figs. 3f, g). ~~Here we provide a~~ short summary of ~~the~~ petrographic  
299 analysis of thin sections of the different types of dolomite with the most important features  
300 compiled in table 1.

301

### 302 *Homogenous dolomites*

303 Homogeneous dolomite beds are usually 10 cm to 50 cm thick, embedded within clays and  
304 ~~with~~ sharp, plane-parallel joints. They consist of dolomicrite, which was described as  
305 aphanotopic dolomite by Breda and Preto (2011), according to the extended nomenclature for  
306 dolomite fabrics by Randazzo and Zachos (1983). The sediment is matrix-supported and  
307 contains irregular, partially rounded mud clasts (intraclasts) that consist of ~~an~~ aphanotopic  
308 dolomite ~~as the matrix~~. Some of the mud clasts contain smaller and somewhat darker  
309 mudclasts or peloids (Fig. 4a, arrow). Soft sediment deformation is often not clearly visible  
310 due to the homogeneous structure of the mud, but it can be observed where the mud clasts are  
311 deformed within the matrix (Fig. 4b). Some of the homogeneous beds in the lower part of the

## Sr-isotopes in Carnian primary dolomite

312 section show sub-millimetre lamination that is only visible under the microscope, where it  
313 ~~appears as an alternation~~ of light (locally coarser) and dark aphanotopic dolomite.

314 The clay content in the homogeneous beds is generally low. A few beds (e.g. at 33.5 m in  
315 the section) consist of silty or sandy dolomite, as reflected in a high abundance of detrital  
316 quartz in thin section. Pseudomorphs after gypsum occur in a dolomite bed at 120 m (Fig. 4c,  
317 d). Moldic porosity occurs ~~in three~~ layers at 43, 65 and 89 m, ~~within aphanotopic dolomite~~.  
318 These ~~are~~ the tempestite beds observed in ~~the~~ outcrop (cf. Breda and Preto, 2011).

319 One homogenous dolomite bed located at 64 m in the section contains oolitic grainstone,  
320 lacking both an aphanotopic and a cement matrix (Fig. 4e). Ooids are either hollow (where  
321 the cores may have been dissolved) or filled with sparite and are surrounded with an  
322 isopachous cement rim.

323

### 324 *Nodular dolomites*

325 Nodular dolomites (Fig. 3b) often occur in beds of vertical peds linked to palaeosols as  
326 indicated by horizons of ~~typical~~ vertical cracks showing green alteration fronts. Single  
327 nodules ~~also may~~ sporadically occur embedded within metre-thick beds of red and green clay.  
328 Nodules are usually 5 to 10 cm in size, consist of aphanitic dolomite or occasionally  
329 somewhat coarser microspar, and in cross section show both red and pale areas. Most  
330 nodules also show a deformed or brecciated internal structure with the interstices between the  
331 clasts mostly consisting of matrix and clay cutans.

332

### 333 *Laminated dolomites*

334 Laminated dolomites occur in the upper part of the clay-rich interval, between 90 and 110  
335 m in the section (Fig. 4f-i). In the field, they show an alternation of light grey dolomite  
336 laminae and dark grey to black clay laminae ~~in the mm-range~~. Some dolomite laminae show  
337 ~~upward bending~~ reminiscent of pseudo-teepee structures (Fig. 4f), ~~and~~ the space within the

teepee is sometimes infilled with sparry cement. Also, the bending of the laminae towards the upward directed cusps is reminiscent of load structures (dish structures), but they also may represent desiccation cracks. The laminae are frequently ripped apart and fragments of laminae occur reworked as flat pebbles embedded in an aphanotopic dolomite matrix (Fig. 4g). Some laminae show a microsparitic appearance and laminar fenestral porosity. In some laminae a peloidal fabric is observed (e.g. in Fig. 4f). Laminae are typically graded, whereby the upper part is darker, indicating an increase in the clay content (Fig. 4h, i). The top of the laminae is often truncated by an erosion surface, and rip-up clasts of the fine mud (~~mud clasts~~) are embedded in the overlying coarse layer. Some laminated dolomites contain continuous layers with inclusions of celestine crystals in the 100- $\mu$ m-range, some of them with barite in their centre (Fig. 5a-c). Occasionally ~~also~~ pyrite occurs.

Under the SEM, laminated dolomites show an anhedral structure in the 1-5  $\mu$ m range. No difference in mineral structure and grain size is ~~usually~~ observed between mud clasts and the surrounding, often lighter-coloured matrix. Dolomite crystals at the margins between dolomite and clay interlayers often coalesce into 5- $\mu$ m-scale round aggregates consisting of several subhedral crystals with different orientation (Fig. 6a, b; the crystals show orientation contrast under BSE mode). Dolomite crystals are often porous, showing a somewhat disordered appearance, but they are surrounded by syntaxial rims. In most cases, the rims entirely fill the intercrystalline space, forming almost hexagonal compromise boundaries (Fig. 6c, d). These rims occur both in homogeneous and laminated dolomites.

358

### 359 *Germanic Keuper dolomites*

360 A sample from the Carnian Lehrberg Beds (middle Lehrberg bed; clay pit Friedland, 12  
361 km south of Göttingen, Northern Germany; Seegis, 1997; Arp et al., 2004) ~~shows~~ a brittle  
362 structure with high porosity. The material consists mainly of packed ooids ~~or rarely~~ peloids in

363 a sparitic cement matrix. Under the SEM, subhedral to euhedral dolomite in the 5- $\mu$ m-range  
364 are observed within the ooids (not shown).

365 A sample from the Norian Arnstadt Fm. (formerly termed “Steinmergelkeuper”; middle  
366 grey series; locality of Krähenberg, 11 km SSW of Göttingen, Northern Germany; Arp et al.  
367 2005) shows a mm-scale lamination and cm- to dm-sized laminated clasts, which were  
368 interpreted as a stromatolite breccia. The laminae contain abundant agglutinated siliciclastic  
369 grains (mainly quartz, subordinate albite) and phosphoritic fish scales. The dolomicrite shows  
370 a subhedral structure in the  $\leq 5$   $\mu$ m range with a few larger subhedral grains resulting in a  
371 porphyrotopic fabric (~~not shown~~).

372

#### 373 **4.2 Mineralogy**

374 Bulk dolomite shows a position of the 104 peak at a mean d-value of 2.88816 Å (Fig. 7a;  
375 Table 2). This indicates a Ca content of 50.7%, based on the equation of Lumsden (1979).  
376 The structural order is indicated by the ratio of the superlattice-ordering peak at (015) to the  
377 (110) ordering peak. The height ratio is 0.44, which is near to 0.519 (Table 2) indicated for an  
378 ordered dolomite in the Highscore database.

379 Clay mineral analysis (Fig. 7b-d) revealed illite in samples TZ14-1 and TZ14-7 and an R3  
380 ordered illite-smectite mixed-layer clay mineral in sample TZ14-9. In the ethylene-glycol-  
381 saturated state, the broad shoulder at 11.4 Å contains components of the illite 001 reflection  
382 and of the fourth order of a 47 Å superstructure peak whose unit cell consists of three 10 Å  
383 illite layers and one 17 Å smectite layer (Moore and Reynolds, 1997). This smectite  
384 component was not observed in samples TZ14-1 and TZ14-7.

385

#### 386 **4.3 Carbon content**

387 Total carbon contents in shales (Table 3) range from 0.06 to 0.51 wt%. Samples TZ16-1  
388 und TZ16-19B showing the lowest TIC of 0.02 wt% were selected as controls to test for

389  $^{87}\text{Sr}/^{86}\text{Sr}$ -ratios of Sr potentially adsorbed to clay minerals. TOC-contents are in the range of  
390 0.05 - 0.16 wt%. Max. TIC-values are 0.46 wt%.

391

#### 392 **4.4 Carbon and oxygen isotopes**

393 Carbon isotope values vary between -3.38 and +4‰ VPDB. Oxygen isotope values are  
394 between -0.7 and +0.9‰ VPDB (three outliers show values as low as -1.5‰ VPDB; Table 4;  
395 Fig. 8a). A clear distinction occurs between nodular dolomites showing negative  $\delta^{13}\text{C}$ -values  
396 and homogeneous dolomites showing positive values. Laminated dolomites show  
397 intermediate values and low variability. The oxygen isotopes show an upward increasing  
398 trend (Fig. 8b). The calculated temperature of formation assuming a Triassic seawater  
399 composition of -1‰ VSMOW using the fractionation equation of Vasconcelos et al. (2005)  
400 shows temperatures between 29 and 39°C. A more positive value of the water would result in  
401 higher temperatures.

402

#### 403 **4.5 Element composition of the dolomites**

404 Concentrations of the elements Al, Ca, Fe, K, Mg, Mn, Na, P, Ti, Ba, Sr, and Rb (mmol/g  
405 sample) are shown in Table 5. Ca contents are between 1.68 and 2.33 mmol/g in the 0.1 N  
406 acetic acid fraction and between 2.71 and 2.87 mmol/g in the 1 N acetic acid fraction. Mg  
407 contents are between 1.61 and 2.34 mmol/g in the 0.1 N acetic acid fraction and between 2.48  
408 and 2.64 mmol/g in the 1 N acetic acid fraction. Based on these concentrations, the amount of  
409 dolomite dissolved is between 30 and 43 wt% of the bulk sample in the 0.1 N acetic acid  
410 fraction and between 49 and 52 wt% in the 1 N acetic acid fraction of the sequential  
411 extraction. In total, between 84 and 90 wt% of the bulk sample were dissolved during these  
412 two extraction steps. If molar concentrations of Ca are plotted vs. Mg a linear trend with a  
413 slope of 0.935 is observed (Fig. 9a), indicating 48.3 mol%  $\text{MgCO}_3$  in the dolomite phase.



414 The Sr-concentrations in bulk dolomite samples are in the range of 0.38 and 1.16  $\mu\text{mol/g}$   
415 in the 0.1 N acetic acid fraction and between 0.57 and 0.79  $\mu\text{mol/g}$  in the 1 N acetic acid  
416 fraction (except one extremely high value of 34.91  $\mu\text{mol/g}$  in sample TZ14-9). These contents  
417 are much higher than in pure clay mineral samples with 0.047-0.417  $\mu\text{mol/g}$  in the 0.1 N  
418 acetic acid fraction and even lower concentrations ( $<0.19$   $\mu\text{mol/g}$ ) in the other fractions. In  
419 all samples measured by ICP-OES, rubidium (Rb) concentrations are below the detection  
420 limit of 0.012  $\mu\text{mol/g}$ .

421 Correlation of Sr contents to other elements did not show clear trends. In particular, Sr-  
422 content did not correlate with Mg or Ca. Sr correlates with K (Fig. 9b), but at the same time,  
423 K is extremely low in all clay mineral leachates.

424

#### 425 **4.6 Sr-isotopes**

##### 426 *$^{87}\text{Sr}/^{86}\text{Sr}$ -ratios of pure minerals*

427 Results of Sr-isotope measurements are listed in Table 6. Repeated extractions of  
428 chemically pure dolomite reference material dissolved in 0.1 N acetic acid showed a range of  
429  $^{87}\text{Sr}/^{86}\text{Sr}$ -ratios between  $0.709942 \pm 0.000011$  and  $0.710831 \pm 0.000007$ . Pure single crystals of  
430 dolomite extracted sequentially showed the highest value ( $0.708401 \pm 0.000040$ ) in the 1 M  
431 NaCl fraction. Values in the 0.1 N acetic acid fraction ( $0.707735 \pm 0.000006$ ) and the 1 N  
432 acetic acid fraction ( $0.707666 \pm 0.000006$ ) are lower by almost 0.001 ~~than in~~ the NaCl  
433 fraction.

434 In pure barite,  $^{87}\text{Sr}/^{86}\text{Sr}$ -ratios decrease by about 0.0013 in the extraction sequence from 0.1  
435 N acetic acid to 6 N HCl. Celestine is highly soluble and was only measured in the 1 M NaCl  
436 fraction and ~~one time~~ in 0.1 N acetic acid. It shows similar values as in the 1 M NaCl fraction  
437 of the pure barite-celestine-dolomite mixture ( $0.708038 \pm 0.000003$ ), but the latter increased to  
438  $0.709501 \pm 0.000040$  in the 0.1 N acetic acid fraction.

439

440 *<sup>87</sup>Sr/<sup>86</sup>Sr-evolution during sequential extraction of dolomites of the Travenanzes Fm.*

441 Different modifications of the sequential extraction were investigated using three samples  
442 (TZ14-1, TZ14-7 and TZ14-9; Table 6). <sup>87</sup>Sr/<sup>86</sup>Sr-ratios decrease in sample TZ14-1 from  
443 0.708125 ±0.000012 to 0.707666 ±0.000004 with increasing strength of the leaching reagent,  
444 while the values remain almost constant in sample TZ14-9. However, repeating the 0.1 N  
445 acetic acid extraction (for 36 h) after a rather intense first extraction (4h, 12h, 4h) resulted in  
446 extremely high values (0.715417 ±0.000250 in TZ14-1 and 0.7192266 ±0.000455 in TZ14-9).  
447 Standard deviations are also higher than in the other fractions.

448 The sequential extractions were repeated, whereby the Sr-concentrations were determined  
449 by ICP-OES (see section above). In addition, 1 N acetic acid and 6 N HCl fractions were  
450 extracted. Results are similar to the previous extraction sequences, but the values further  
451 decreased in the 1 N acetic acid fraction. Only the HCl-fraction showed very high values of  
452 0.730453 ±0.000005 in sample TZ14-7.

453 Sequential extractions of the clay samples from the Travenanzes Fm. show a similar  
454 increase with the sequential extraction steps from 0.1 N acetic acid fraction to 6 N HCl, where  
455 <sup>87</sup>Sr/<sup>86</sup>Sr-ratios reach similar values as in the dolomite extracts (from 0.722998 ±0.000018 to  
456 0.733910 ±0.000024).

457

458 *<sup>87</sup>Sr/<sup>86</sup>Sr-ratios in micro-drilled dolomite*

459 Eleven dolomite samples were micro-drilled from areas where dolomite was most pure  
460 based on examination by SEM and dissolved in 0.1 N acetic acid. The values of the  
461 Travenanzes Fm. are in the range of 0.707672 ±0.000003 to 0.707976 ±0.000004. The highest  
462 value occurs in a dolomite nodule, while no systematic difference between homogenous and  
463 laminated dolomite was observed. Dolomite of the Germanic Keuper samples shows much  
464 higher <sup>87</sup>Sr/<sup>86</sup>Sr-ratios of 0.709303 ±0.000006 and 0.709805 ±0.000005, respectively.

465

466 *<sup>87</sup>Sr/<sup>86</sup>Sr-ratios of modern dolomites (Deep Springs Lake, Coorong Lakes)*

467 Dolomites of Deep Springs Lake show strongly radiogenic values of  $0.713086 \pm 0.000004$   
468 and  $0.713207 \pm 0.000004$ , which are much higher than modern seawater values, ~~showing~~ a  
469 <sup>87</sup>Sr/<sup>86</sup>Sr-ratio of  $0.709234 \pm 0.000009$  (DePaolo and Ingram, 1985). In contrast, dolomite from  
470 the Coorong Lakes (Milne Lake) ~~shows~~ ratios between  $0.709251 \pm 0.000004$  and  $0.709275$   
471  $\pm 0.000003$ , which is very near to modern seawater. Different incubation times (5 min und 10  
472 h) in 0.1 N acetic acid had no influence on the isotope ratios.

473

## 474 **5 Discussion**

### 475 **5.1 Interpretation of microfacies within different types of dolomite**

#### 476 *Homogeneous dolomite beds*

477 The homogeneous dolomite beds, which are mainly intercalated in the lower, clay-rich part  
478 of the Travenanzes Fm., consist of fine-grained dolomicrite (aphanotopic dolomite), with  
479 occasional intraclasts of the same aphanotopic dolomite ~~as the matrix~~. Soft sediment  
480 deformation and dolomicrite infill between mud clasts indicate that this sediment consisted ~~to~~  
481 ~~a large extent~~ of unlithified carbonate mud. Based on the abundance of fine mud, water  
482 energy was probably not very high (Demicco and Hardie, 1994), although reworking and  
483 partial rounding of the mud clasts require ~~at least occasionally~~ higher water energies.  
484 According to the standard microfacies concept ~~this type falls into SMF 23~~ (“non-laminated  
485 homogeneous micrite and microsparite without fossils”), indicating ~~a~~ deposition in “saline  
486 and evaporative environments, e.g. in tidal ponds” (Flügel, 2010). ~~Also~~, SMF 24 (“lithoclastic  
487 floatstones, rudstones and breccias”) is observed in some of the beds where mud clasts are  
488 abundant. These facies types are consistent with supersaturation-driven precipitation of ~~a~~ fine-  
489 grained authigenic carbonate in environments ~~partially restricted from open seawater~~ and  
490 would match ~~both~~ with a coastal sabkha environment and/or ~~with~~ shallow ephemeral lakes.

## Sr-isotopes in Carnian primary dolomite

491 Ephemeral lakes may have formed on extended coastal alluvial plains along the Tethyan  
492 margin during the Carnian. The fine mud may have been homogenized and redistributed due  
493 to minor wave action in the ponds (cf. Ginsburg, 1971).

494 ~~In a semi-arid climate,~~ episodic flooding of the alluvial plains by river water, which  
495 ~~however mostly evaporated before reaching the coast,~~ led to the formation of a dryland river  
496 system (Breda and Preto, 2011). The fluvial system may have supplied water to temporally  
497 ~~existing~~ evaporating ponds. Alternatively, the alluvial plain may have been sporadically  
498 flooded by seawater, explaining the intercalations of authigenic dolomite layers ~~in the~~  
499 ~~succession of~~ alluvial clays. Homogeneous dolomites show a positive carbon isotope  
500 signature between 0.7 and 4‰ VPDB (except one outlier), which ~~would be~~ consistent with  
501 formation from unaltered marine carbon in evaporative brine, with no significant contribution  
502 of  $^{12}\text{C}$  derived from organic matter. ~~As indication of evaporative conditions,~~ several gypsum  
503 beds occur between 45 and 70 m in the section, and pseudomorphs after gypsum ~~were~~  
504 observed in a thin section ~~of~~ a dolomite at 120 m (Fig. 4c, d). ~~But~~ evaporites may not always  
505 be preserved as they ~~were most likely~~ dissolved due to seasonally wet conditions.

506 While most homogeneous dolomite beds consist of aphanitic dolomite, a bed of dolomitic  
507 ooid grainstone devoid of matrix occurs at 64 m (Fig. 4e), and tempestites ~~showing~~  
508 porosity indicative of dissolved allochems and dissolved fossils occur at several levels in the  
509 section. These beds must represent events of higher water energy, contributing sediment from  
510 more open marine areas. The presence of marine fossils, such as *Megalodon*, indicate that ~~at~~  
511 ~~least episodically~~ the environment was ~~marine influenced~~. The microfacies of the oolite falls  
512 into SMF 15, which indicates proximity to the seaward edge of the platform. A similar facies,  
513 however, is encountered in the Carnian Lehrberg Beds (Seegis, 1997) in a lacustrine setting.  
514 Several beds containing abundant siliciclastic material (mainly angular quartz clasts) are ~~more~~  
515 likely due to a riverine flooding event, ~~providing~~ detrital material from the continent. Thus,

516 the microfacies in homogenous dolomite beds indicates both marine and continental influence  
517 on the depositional environment.

518

#### 519 *Laminated dolomite*

520 ~~In the upper part of the clay rich interval, predominantly~~ laminated dolomites reminiscent  
521 of loferites (Fischer, 1964) occur. The change from more homogeneous to laminated dolomite  
522 intercalations correlates with the change from red to dark grey clay. The lamination consists  
523 of millimetre-scale dolomite/clay interlayers suggesting ~~an alternation~~ of clay and fine  
524 dolomite ~~deposition~~. The microfacies falls into SMF 25 (“laminated evaporite-carbonate  
525 mudstone facies”) indicating an “upper intertidal to supratidal sabkha facies in arid and  
526 semiarid coastal plains and evaporitic lacustrine basins” (Flügel, 2010). Laminae showing soft  
527 sediment deformation ~~could~~ not be attributed to stromatolitic bindstone facies (SMF 19 to 21).  
528 Only some layers showing a coarser fabric with interstitial dolosparite or dolomicrosparite  
529 containing putative peloids have been interpreted as microbial laminites (Preto et al., 2015).  
530 ~~Mostly, graded bedding~~ indicates a direct sedimentation process rather than in situ  
531 precipitation of the primary carbonate within a microbial mat (Vasconcelos et al., 2006;  
532 Bouton et al., 2016; Court et al., 2017; Perri et al., 2018). A detrital origin of the clay in the  
533 dolomites is confirmed by the well-ordered illite-smectite mixed-layer composition which  
534 ~~would be~~ atypical for authigenic clay minerals. Frequent subaerial exposure and desiccation  
535 may explain why the sediment was not homogenized and the lamination is preserved. This is  
536 supported by the occurrence of pseudo-teepee structures as remnants of desiccation cracks.  
537 Rip-up clasts were formed during subsequent flooding, whereby angular flat pebbles occur  
538 where the sediment was desiccated or partially lithified. However, laminae also show  
539 frequently plastic deformation (e.g. in Fig. 3g) where the mud was still unlithified.

540 Some uncertainty exists as to whether the facies was peritidal or represents ephemeral  
541 lakes, as suggested for the homogeneous dolomites above. Episodic high water-energy

542 indicated by the rip-up clasts, combined with frequent desiccation, could point to evaporative  
543 tidal conditions, ~~as they~~ occur in a sabkha. What is atypical for a modern sabkha is the large  
544 amount of detrital input. ~~But this is owed to the~~ seasonally wet conditions during the Carnian  
545 and the facies can be considered a mixed facies of alluvial plain and coastal sabkha: a “dirty”  
546 sabkha. Under such conditions, the large amounts of evaporites, in particular gypsum, ~~as they~~  
547 ~~usually occur in a sabkha~~, could have been dissolved. Why the occurrence of laminated  
548 dolomites coincides with the transition from red to grey clays is not clear but may be related  
549 to more permanently water-saturated conditions in the subsurface, while the surface was  
550 exposed to periodic desiccation. ~~Also this would~~ be consistent with a sabkha environment.

551

#### 552 *Nodular dolomite*

553 The clay beds were subject to strong evaporation and vadose diagenesis causing oxidation  
554 and red colour. This generally indicates, at least seasonally, arid conditions. Dolomite nodules  
555 that occur sporadically within certain intervals show internal brecciation, which probably  
556 occurred after sedimentation. Internal brecciation is a typical feature of present day calcretes  
557 in arid environment (e.g. Mather et al., 2018). Slightly negative  $\delta^{13}\text{C}$ -values indicate a  
558 contribution of carbon derived from organic matter degradation, suggesting that they formed  
559 within the sediment. Presumably the formation of dolomite nodules could be related to  
560 diagenesis in palaeosols. In the upper part of the section (between 80 and 105 m) dolomite  
561 nodules are associated with green reaction haloes along vertical peds in palaeosols of vertisol-  
562 calcisol type (Preto et al., 2015). Carbonate formation may have been related to reducing  
563 fluids in water-logged soils during humid intervals, while the crack formed during desiccation  
564 in dry periods, perhaps facilitated by the presence of expandable clay minerals (smectite).

565

#### 566 **5.2 The origin of ionic solutions conducive to dolomite formation**

567 Overall, the dolomites in the Travenanzes Fm. show facies that match a variety of potential

568 depositional environments. They ~~show some~~ similarity to the Germanic Keuper, and it is not  
569 entirely clear ~~from the facies, whether~~ a marine influence occurred, except ~~if~~ indicated by  
570 marine fossils, as in the tempestite beds. ~~To~~ better trace the origins of ionic solutions to the  
571 environments that were conducive to dolomite formation, ~~Sr-isotopes were analysed.~~

572

573 *Strontium derived from seawater*

574 Radiogenic  $^{87}\text{Sr}/^{86}\text{Sr}$  ratios can be indicative of the source of ionic solutions ~~from which~~ the  
575 dolomite precipitated (Müller et al., 1990a; Müller et al., 1990b). Sr-isotopes in selected  
576 dolomites ~~through~~ the Travenanzes Fm. at the Dibona section showed values between  
577  $0.707672 \pm 0.000003$  and  $0.707976 \pm 0.000004$ . We correlate the Dibona section (Fig. 10) with  
578 the Carnian seawater curve (Korte et al., 2003). ~~Although~~ the age interval of the Travenanzes  
579 Fm. is not precisely constrained, ~~findings of ammonites~~ at the base of the succession suggest a  
580 Tuvalian II age (*subbullatus* zone, 232.5-231.0 Ma; Ogg, 2012). The upper boundary of the  
581 Travenanzes Fm. is time-transgressive and hence the age not precisely constrained. We  
582 assume that the sedimentation rate was at least as high, or higher, than in the peritidal  
583 carbonates of the Dolomia Principale. In this region, the Dolomia Principale includes a part of  
584 the Rhaetian (Neri et al., 2007) and, thus, its upper boundary is near the Triassic-Jurassic  
585 boundary at 201.3 Ma. The seawater curve was ~~fixed~~ at the lower boundary of the  
586 Travenanzes Fm. and the time axis was varied to fit the seawater curve parallel to the  
587 envelope of minimal  $^{87}\text{Sr}/^{86}\text{Sr}$ -ratios measured in the dolomites (Fig. 10). The base of the first  
588 massive dolomite at 110 m in the profile would ~~then~~ have an age of approximately 229 Ma.

589 Comparison with the seawater curve shows that the dolomites of the Travenanzes Fm. have  
590 largely marine  $^{87}\text{Sr}/^{86}\text{Sr}$ -ratios (Fig. 10). Only values from micro-drilled samples ~~most gently~~  
591 extracted with 0.1 N acetic acid were used for this reconstruction, and the resulting values all  
592 lie within ~~a range of~~ 0.00022 ~~with the~~ seawater values (grey shaded area). This scatter  
593 towards more positive values, compared to seawater, may be due to a small influence of

## Sr-isotopes in Carnian primary dolomite

594 continental water. Indeed, during deposition of the Travenanzes Fm. sufficient continental  
595 water would have been available from rivers, and ions may have become concentrated while  
596 the water was evaporating in the distal alluvial plain. Alternatively, Sr desorbed from clay  
597 minerals could have added more radiogenic values to the brine. But even if a small influence  
598 of Sr of continental origin is present, ~~because of the much higher Sr concentrations in~~  
599 ~~seawater~~, the marine signal is dominant.

600 This observation does not support the classical Coorong model for dolomite formation,  
601 where alkalinity is largely derived from continental groundwater. The Coorong Lakes in  
602 South Australia are ephemeral lakes largely supplied with groundwater (Von der Borch et al.,  
603 1975). Strangely, ~~though~~, the  $^{87}\text{Sr}/^{86}\text{Sr}$  ratios we measured in Milne Lake (one of the Coorong  
604 Lakes) ~~show~~ modern seawater composition (Fig. 11), but this can be explained as the local  
605 groundwater largely originates from a Pleistocene carbonate aquifer, ~~accordingly~~ carrying a  
606 Pleistocene Sr-isotope signature. A similar scenario for the Travenanzes Fm. is unlikely as the  
607 only large-scale preceding carbonate platforms at that time were the ~~Late~~ Ladinian-Carnian  
608 Cassian dolomite platforms (Russo et al., 1997). ~~But~~ based on the stratigraphic context, all  
609 basins between these platforms were infilled by the Heiligkreuz Fm. and an extremely flat  
610 topography ~~had~~ established that ~~was~~ stratigraphically overlain and sealed by the alluvial  
611 deposits of the laterally persistent Travenanzes Formation. Furthermore, the Travenanzes Fm.  
612 consists of 100 m of impermeable clay (~~containing~~ expandable clays) such that a long-  
613 distance transport of groundwater can be excluded.

614 We conclude that the  $^{87}\text{Sr}/^{86}\text{Sr}$  ratios of the dolomites ~~truly~~ represent a ~~dominating~~ marine  
615 influence. Presumably, seawater was transported to the interior of the platforms by episodic  
616 flooding (spring tide or storm) events. Even in a seasonally wet climate, the input of river  
617 water on Sr-isotopes was insignificant compared to the influence of ions (including Sr) from  
618 seawater that ~~became~~ concentrated by evaporation. Laminated dolomites in the uppermost  
619 part of the section show values most similar to seawater composition, which is consistent with



620 a greater influence of peritidal conditions.

621

622 *The influence of Sr adsorbed to clay minerals*

623 An outlier with higher  $^{87}\text{Sr}/^{86}\text{Sr}$  ratios occurs in a dolomite nodule, presumably representing  
624 a more continental influence or perhaps more seasonally wet and evaporative conditions with  
625 less marine influence. But also higher values may be due to contamination and partial  
626 leaching of clay minerals within the dolomite samples. Within the extraction sequence (1 M  
627 NaCl  $\rightarrow$  0.1 N acetic acid  $\rightarrow$  1 N acetic acid), the  $^{87}\text{Sr}/^{86}\text{Sr}$  ratio generally remains constant or  
628 becomes slightly less radiogenic, i.e., more similar to seawater. However, the values strongly  
629 increase with leaching in 6 N HCl (Table 6). A modification of the  $^{87}\text{Sr}/^{86}\text{Sr}$  ratios due to  
630 contamination by  $^{87}\text{Sr}$  from the radioactive decay of  $^{87}\text{Rb}$  to  $^{87}\text{Sr}$  can be considered as  
631 negligible since the concentrations of Rb was below the detection limit of 0.05 ppm (Table 5)  
632 and the half time of the decay is 48.8 billion years. Also, an influence of celestine and Sr-rich  
633 barite, observed under the SEM, on the Sr-isotope values can be largely excluded. These  
634 mineral phases are bound to distinct layers of the laminated dolomites, where they could be  
635 avoided by micro-drilling in areas where the dolomite was pure. Only one value in sample  
636 TZ14-9 shows extremely high Sr-concentrations. This sample was micro-drilled near to a  
637 celestine layer and it is therefore not surprising that a celestine crystal may have been leached.  
638 The isotopic composition of the celestine is also similar to Carnian seawater.

639 In the NaCl-fraction only minimal amounts of dolomite are dissolved. The slightly more  
640 radiogenic  $^{87}\text{Sr}/^{86}\text{Sr}$  ratio may be derived from Sr that is lightly adsorbed to clay minerals and  
641 finely dispersed in the clay matrix, although  $\text{Sr}^{2+}$  as a two-valent cation is more strongly  
642 adsorbed to clay mineral than  $\text{Na}^+$ , and thus not easily desorbed by NaCl. ~~With increasing~~  
643 ~~extraction efficiency and purity of the carbonate phase,~~ the values approach seawater values  
644 in the 1 N acetic acid fraction. Also, values from micro-drilled samples are generally more  
645 similar to seawater values, probably because more pure dolomite was sampled (Table 6). 1 N

646 acetic acid is usually observed ~~not to~~ strongly attack interlayer ions in clay minerals.

647 Clay minerals leached in 6 N HCl show significantly more radiogenic values compared to  
648 dolomite samples (Table 6). This finding is consistent with strongly radiogenic values in the 6  
649 N HCl-fraction of dolomite samples (up to  $0.730453 \pm 0.000005$ ) and supports that the clay  
650 minerals are the carriers of a Sr-pool significantly more radiogenic than the carbonate phase  
651 showing marine values. Sr is known to adsorb to illite-smectite mixed layer clay minerals  
652 (Missana et al., 2008). The HCl-fraction most likely includes adsorbed Sr, and Sr occupying  
653 the interlayer positions of the clay minerals, and presumably also structurally bound Sr in the  
654 clay mineral phase. In particular, illite-smectite mixed-layer clay minerals, as detected by  
655 XRD of the clay mineral separate in sample TZ14-9 (Fig. 7d), could have two different  
656 origins, burial diagenesis and continental weathering. Based on the tectonic setting and low  
657 burial depth of the Dolomites, burial depth for smectite-illite transition has not been reached.  
658 Therefore, these minerals are most likely derived from silicate weathering, with the Sr-  
659 signature representing the crustal origin of the parent rock. Our finding of radiogenic Sr-  
660 isotope ratios supports that clay minerals did not ~~essentially~~ incorporate ~~the~~ Sr from seawater,  
661 ~~delivered at~~ high sealevel stand. It is therefore clear that Sr extracted from the dolomites is not  
662 derived from clay minerals.

663

#### 664 *Dolomite as primary archive of Sr-isotope signatures*

665 The question is, whether Sr truly represents the conditions of dolomite formation or  
666 whether it ~~inherits~~ the Sr content of some precursor phase. Baker and Burns (1985) and  
667 Vahrenkamp and Swart (1990) ~~showed~~ very small distribution coefficients between aqueous  
668 and solid solutions, and high Sr-contents measured in Abu Dahbi sabkha dolomites (Müller et  
669 al., 1990b) may be derived from precursor aragonite. However, dolomite in the Travenanzes  
670 Fm. is largely primary (Preto et al., 2015) and thus not formed from an aragonite precursor. It  
671 is likely that remobilization of Sr during burial may have released ~~parts of the~~ Sr from

672 dolomite ~~which~~ is now present as celestine and barite inclusions.

673 Furthermore, Sánchez-Román et al. (2011) demonstrated that protodolomite forming in  
674 culture experiments contain Sr in the range of several thousand ppm. The incorporation  
675 mechanism of Sr is still not entirely clear, since Sr is a large ion that should occupy the sites  
676 of Ca in the crystal lattice. However, in Sánchez-Román et al. (2011) Sr appears to correlate  
677 with the Mg content, and another incorporation mechanism may occur, such as ~~by~~ surface  
678 entrapment. A correlation of Sr-contents with K-contents is observed for the Travenanzas  
679 dolomites. It could be circumstantial, but would not be inconsistent with an alternative  
680 mechanism of Sr-incorporation, such as surface entrapment. Even if ~~it is taken into account~~  
681 ~~that~~ only protodolomite formed in microbial culture experiments (Gregg et al., 2015), natural  
682 modern dolomites are often rich in Sr (e.g. Meister et al., 2007). The Sr could occur in  
683 disordered nano-structural domains that are not picked up in the bulk XRD-signal.  
684 Alternative, non-classical nucleation and growth pathways, e.g. by nano-particle attachment,  
685 could play a role in the abnormal partitioning of Sr in the dolomite lattice. Thus, a high Sr-  
686 content in the Travenanzas Fm. or in Abu Dhabi Sabkha dolomites is likely a true signature of  
687 primary dolomites.

688

### 689 **5.3 Mode of dolomite formation and comparison with known models**

#### 690 *Primary dolomite formation*

691 Several indications support that the origin of dolomite in the Travenanzas Fm. ~~is largely~~  
692 ~~primary~~. Formation temperatures reconstructed from oxygen isotopes ~~and~~ assuming Triassic  
693 seawater composition of -1‰ VSMOW are between 28 and 33°C. If a typical <sup>18</sup>O enrichment  
694 of 3‰ in a sabkha (McKenzie et al., 1980; McKenzie, 1981) is assumed, the calculated  
695 temperatures ~~would be~~ between 40 and 50°C, which is still within a range ~~possible~~ in a  
696 sabkha. Both temperature and evaporation may have changed over time, which may explain  
697 the observed linear trend in oxygen isotopes across the section (Fig. 8B). Furthermore, there is

698 no co-variation between  $\delta^{13}\text{C}$  and  $\delta^{18}\text{O}$ , as opposed to evaporation in hydrologically closed  
699 settings such as the Germanic Keuper basin (Reinhardt and Ricken, 2000; Arp et al., 2005).  
700 Both oxygen isotopes and nano-crystalline structures observed by Preto et al. (2015) preclude  
701 a later pervasive recrystallization during burial diagenesis. Sedimentary structures indicate  
702 that most of the homogenous dolomite and laminae containing aphanotopic dolomite was  
703 unlithified, and dolomite was therefore deposited as fine-grained mud. This is further  
704 supported by mm-scale interlayering of clay and dolomite in the laminated dolomites near the  
705 top of the sequence, and some dolomite/clay couplets ~~showing a~~-fining-upward bedding.  
706 Based on the observation of nano-crystal structures, replacement did not take place, and it  
707 appears logical to assume that the primary phase was already dolomite.

708 While most of the dolomite may have been primary, micron-scale interstices between the  
709 dolomicrite grains must have been cemented after deposition. This cementation resulted in  
710 rims visible under ~~the~~ SEM and ~~resulting~~ in near hexagonal compromise boundaries. The  
711 cement may have contributed  $^{13}\text{C}$ -depleted carbon during early diagenesis. The lowest  $\delta^{13}\text{C}$   
712 values of  $-3.4\text{‰}$  VPDB occur in the nodules. There is no indication that these nodules formed  
713 at the surface. They rather formed within the sediment, probably due to reducing conditions  
714 and influenced by dissolved inorganic carbon from degrading organic matter in the  
715 palaeosols. Homogeneous and laminated dolomites are clearly distinct from nodules in their  
716 carbon isotope compositions (Fig. 8a), indicating only a minor contribution from pore-water  
717 derived dissolved inorganic carbon. Carbon isotope values are thus largely consistent with a  
718 primary precipitation. The mode of dolomite formation as fine mud and subsequent  
719 cementation is comparable to several modern sites of dolomite formation.

720

### 721 *The sabkha model*

722 The classical sabkha model involves dolomite formation under intra-supratidal conditions,  
723 ~~concentration~~ of brines through either seepage reflux (Adams and Rhodes, 1960) or

724 evaporative pumping (Hsü and Siegenthaler, 1969; Hsü and Schneider, 1973; McKenzie et  
725 al., 1980; McKenzie, 1981) and precipitation of dolomite ~~upon increase of the~~ Mg/Ca ratio  
726 due to gypsum precipitation (see Machel, 2004, for a more detailed discussion of varieties of  
727 sabkha models). ~~This group of models allow~~ for a mixture of seawater and continental  
728 groundwater, with seawater providing ~~mainly~~ the ions for dolomite precipitation. Coastal  
729 sabkhas are typically characterized by laminated (Lofer-type) dolomites, ~~whereby~~ the laminae  
730 are largely ~~still~~ unlithified after deposition (Illing, 1965; Bontognali et al., 2010; Court et al.,  
731 2017). In ~~fact, in~~ the sabkha of Abu Dhabi, both pathways, via replacement of precursor  
732 aragonite and by direct precipitation of dislocation-ridden primary dolomite, ~~were~~ observed  
733 (Wenk et al., 1993).

734 The sabkha model is thus a reasonable model for the uppermost parts of the Travenanzes  
735 section, ~~showing~~ laminated dolomites, marine Sr-isotope values and indications of frequent  
736 desiccation and flooding in a peritidal setting. Yet, the conditions differed ~~from~~ the modern  
737 sabkhas along the Persian Gulf ~~by~~ the large amount of alluvial clay (dirty sabkha), as opposed  
738 to aeolian sand. Most of the fine lamination ~~then~~ may ~~result~~ from periodically varying  
739 conditions, perhaps with clay deposition during episodes of fluvial discharge and carbonate  
740 deposition during evaporative conditions.

741

#### 742 *The continental playa lake model*

743 The playa lake model was originally suggested by Eugster and Surdam (1973) for dolomite  
744 of the Green River Formation (Wyoming), but the primary formation of fine dolomite mud is  
745 observed in many alkaline playa lakes, such as Deep Springs Lake (Peterson et al., 1963;  
746 Clayton et al., 1968; Meister et al., 2011), Lake Acigöl (Turkey; Balci et al., 2017), Lake  
747 Neusiedl (Austria; cf. Neuhuber et al., 2016), ~~Lake~~ Van (Turkey; McCormack et al., 2018; for  
748 an overview see Eugster and Hardie, 1978, and Last, 1990). This type of setting has also been  
749 suggested for the Germanic Keuper deposits during the late Carnian and Norian, when the

## Sr-isotopes in Carnian primary dolomite

750 Germanic Basin was entirely disconnected from ~~the~~ Panthalassa ~~ocean~~ and was continental  
751 (Reinhardt and Ricken, 2000). The Travenanzes Fm., with its homogeneous dolomite  
752 intercalations in red and green clays, is strikingly similar to playa-lake Keuper facies in the  
753 Germanic Basin. There, dolomite formed ~~upon~~ evaporation and concentration of the  
754 continental brines under ~~semi~~-arid climate.

755 ~~However~~, Sr-isotope data support a dominantly marine origin of ionic solutions to the  
756 Travenanzes Fm., whereas Sr-isotopes are strongly radiogenic in the Germanic Keuper  
757 dolomites (or in Deep Springs Lake; Fig. 11). The two settings are thus fundamentally  
758 different. Even dolomite nodules, showing somewhat more radiogenic values than seawater in  
759 the Travenanzes Fm., ~~are~~ still indicating a ~~dominating~~ marine influence. The slightly more  
760 radiogenic influence could be due to ~~the~~ clay minerals present in the nodules that were  
761 difficult to entirely separate from the carbonate. Also, dolomite nodules may have formed in  
762 relation to palaeosols, during somewhat more humid times and, thus, may have been slightly  
763 influenced by continental water input from ~~the~~ rivers.

764

### 765 *The coastal ephemeral lake model (Coorong model)*

766 The Coorong model was proposed by Von der Borch et al., 1975; Von der Borch 1976;  
767 Rosen et al., 1989; see Warren, 2000, for detailed information), explaining the formation of  
768 primary and uncemented dolomite in the Coorong lakes of South Australia. The isotope  
769 values show that the contribution of ionic solutions, and hence alkalinity, of continental origin  
770 to the dolomitizing fluids was minimal and that the dolomites are seawater derived. This may  
771 be distinct from the typical Coorong model, where alkalinity is provided from an inland karst  
772 system. But other coastal ephemeral lakes exist, ~~such as~~ along the Brazilian coast north of Rio  
773 de Janeiro. Partially unlithified dolomite occurs in Brejo do Espinho (Sánchez-Román et al.,  
774 2009), which is ~~in fact~~ largely similar to the Coorong lakes, but ionic solutions are ~~largely~~  
775 derived from seawater.

776 A coastal ephemeral lake model would probably be most suitable to explain homogeneous  
777 dolomite beds of the Travenanzes Fm., where hypersaline ponds may have formed in a  
778 dryland river system. However, unlike ~~the~~ recent ephemeral lakes (such as Lagoa Vermelha,  
779 Brejo do Espinho and the Coorong Lakes) the clay-rich sediment must have inhibited  
780 groundwater flow. Hence, while modern coastal ephemeral lakes receive their water largely  
781 through seawater percolating through porous dune sand, episodic flooding with seawater must  
782 have provided ionic solutions for dolomite formation on the Carnian platform.

783

784 *A non-actualistic system*

785 Overall, the depositional environment reconstructed for the Travenanzes Fm. shows  
786 similarities to modern systems were dolomite forms. Among all the scenarios, a coastal  
787 ephemeral lake model would be most similar to the conditions conducive to homogeneous  
788 dolomites, lacking signs of frequent desiccation, while a coastal sabkha model may explain  
789 the laminated intervals near the top of the studied succession. In contrast to ~~any~~ modern  
790 systems, the clay rich sediments of the Travenanzes Fm. precluded any transport of  
791 groundwater, which plays a role for ionic transport in both the modern day ephemeral lake  
792 model and the different versions of sabkha models. Although modern systems provide valid  
793 analogues for the mechanism of dolomite formation in the past, and probably throughout  
794 Earth's history, none of them is an exact environmental analogue. The Carnian alluvial plains  
795 that covered an enormous area along the Tethys margin (e.g. Garzanti et al., 1995) represent a  
796 non-actualistic system in terms of their sedimentary, hydrological and climatic conditions.  
797 Besides, the geochemistry of Tethys seawater may also have been different from today, an  
798 issue that requires further investigation. These aspects need to be taken into account if we  
799 intend to understand ~~the role of~~ dolomite formation through Earth history.

800 In the light of a possible spontaneous precipitation as fine mud in the water column,  
801 perhaps via formation and aggregation of nano-particles, further discussion of a nucleation

802 and growth pathway of dolomite ~~will be~~ necessary. While several modifiers may also play a  
803 role in the water column, such as dissolved organic matter (Frisia et al., 2018), microbial EPS  
804 (Bontognali et al., 2013), or suspended clay particles (Liu et al., 2018), fluctuating conditions  
805 inducing spontaneous nucleation and growth of dolomite, in agreement with Ostwald's step  
806 rule (Deelman, 1999), require further consideration as a factor favourable for dolomite  
807 formation on a seasonally variable platform (Meister and Frisia, accepted).

808 The main finding of this study is that most of the dolomite in the >100 m thick  
809 Travenanzes Fm. probably formed through direct precipitation ~~in~~ a seawater-derived solution.  
810 This mode of primary dolomite formation has rarely been considered in the study of  
811 ~~geological dolomite bodies~~, but may explain the genesis of many other large-scale, fine  
812 dolomite units that preserve fossils and sedimentary structures.

813

## 814 **6 Conclusions**

815 Dolomite beds intercalated in a 100-m-thick Carnian alluvial clay sequence in the  
816 Travenanzes Fm. largely formed as fine-grained primary mud. The depositional environment  
817 was minimally affected by currents and most likely prevailed as ephemeral lakes in an  
818 extended alluvial plain or dryland river system. The large amounts of clay are related to at  
819 least seasonally wet conditions. ~~Also~~ palaeosols and diagenetic dolomite nodules could have  
820 formed under such conditions. The facies ~~resembles strongly~~ those of ~~the~~ Triassic playa lakes  
821 ~~prevailing~~ in the Germanic Basin ~~or~~ in the modern Deep Springs Lake.

822 Sr-isotopes clearly show a marine signal, indicating seawater as the main source of ions.  
823 The depositional environment ~~shows most similarities with~~ coastal ephemeral lakes resulting  
824 in the deposition of homogeneous dolomite beds through most of the sequence, changing into  
825 a "dirty" sabkha near the top of the sequence, where fine dolomite/clay interlayers suggest  
826 alternating deposition of extremely fine authigenic dolomite from evaporating water, and  
827 clay.



828 Overall, Sr-isotopes and petrographic observations provide insight into a non-  
829 uniformitarian system including both elements of coastal ephemeral lake systems and sabkhas  
830 as an environment of primary dolomite formation. Considering the precipitation of primary  
831 dolomite from coastal lakes or ponds may help explaining other dolomite deposits with  
832 preserved sedimentary features throughout geologic history.

833  
834 *Acknowledgements.* We thank C. Beybel, I. Wünsche, and L. Slawek for preparing high-  
835 quality petrographic thin sections. Thanks also to W. Obermaier for analysing element  
836 concentrations by ICP-OES and P. Körner for support during TOC measurements. S.  
837 Niebergall provided some of the petrographic images. We furthermore thank S. Viehmann for  
838 help during sampling and supervision of the students in the field and B. Bethke for her strong  
839 support in the laboratory. Thanks also to M. Lorencak for the help during sampling of  
840 dolomite from the Coorong Lagoon. We thank S. Frisia for input and constructive criticism.  
841 F. Franchi and H. Machel reviewed an early version of this manuscript. The study was  
842 partially supported by the Marie Curie Intra-European Fellowship Project Triadol (Project no.  
843 626025).

844

#### 845 **References**

- 846 Adams, J.E., and Rhodes, M.L.: Dolomitization by seepage refluxion, Am. Assoc. Petrol.  
847 Geol. Bull., 44, 1912–1921, 1960.
- 848 Alderman, A.R. and Skinner, H.C.W.: Dolomite sedimentation in the South-East of South  
849 Australia, Am. J. Sci., 255, 561–567, 1957.
- 850 Arp, G., Hoffmann, V.-E., Seppelt, S., and Riegel, W.: Trias und Jura von Göttingen und  
851 Umgebung, 74. Jahrestagung der Paläontologischen Gesellschaft, 2.-8.10.2004, Exkursion,  
852 6, 147–192, Göttingen (Universitätsdrucke), 2004.

## Sr-isotopes in Carnian primary dolomite

- 853 Arp, G., Bielert, F., Hoffmann, V.-E., and Löffler, T.: Palaeoenvironmental significance of  
854 lacustrine stromatolites of the Arnstadt Formation (“Steinmergelkeuper”, Upper Triassic,  
855 N-Germany), *Facies*, 51, 419–441, 2005.
- 856 Baker, P.A. and Burns, S.J.: Occurrence and formation of dolomite in organic-rich continental  
857 margin sediments, *Am. Assoc. Petrol. Geol. Bull.*, 69, 1917–1930, 1985.
- 858 Balci, N., Menekşe, M., Karagüler, N.G., Sönmez, M.S., and Meister, P.: Reproducing  
859 authigenic carbonate precipitation in the hypersaline Lake Acıgöl (Turkey) with microbial  
860 cultures, *Geomicrobiology Journal*, 33, 758-773, 2016.
- 861 Bontognali, T.R.R., Vasconcelos, C., Warthmann, R.J., Bernasconi, S.M., Dupraz, C.,  
862 Strohmenger, C.J., and McKenzie, J.A.: Dolomite formation within microbial mats in the  
863 coastal sabkha of Abu Dhabi (United Arab Emirates), *Sedimentology*, 57, 824–844, 2010.
- 864 Bontognali T.R.R., McKenzie J.A., Warthmann R. and Vasconcelos C. (2013) Microbially  
865 influenced formation of Mg-calcite and Ca-dolomite in the presence of exopolymeric  
866 substances produced by sulphate-reducing bacteria. *Terra Nova*, 26, 72–77.
- 867 Bouton, A., Vennin, E., Pace, A., Bourillot, R., Dupraz, C., Thomazo, C., Brayard, A.,  
868 Désaubliaux, G., and Visscher, P.T.: External controls on the distribution, fabrics and  
869 mineralization of modern microbial mats in a coastal hypersaline lagoon, Cayo Coco  
870 (Cuba), *Sedimentology*, 63, 972–1016, 2016.
- 871 Brack, P., Mundil, R., Oberli, F., Meier, M., and Rieber, H.: Biostratigraphic and radiometric  
872 age data question the Milankovitch characteristics of the Latemar cycles (Southern Alps,  
873 Italy), *Geology*, 24, 371–375, 1996.
- 874 Brack, P., Rieber, H., and Urlichs, M.: Pelagic successions in the Southern Alps and their  
875 correlation with the Germanic Middle Triassic, *Zentralbl. Geol. Paläontol. Teil I*, 7–8,  
876 853–876, 1999.

## Sr-isotopes in Carnian primary dolomite

- 877 Breitenbach, S.F.M. and Bernasconi, S.M.: Carbon and oxygen isotope analysis of small  
878 carbonate samples (20 to 100  $\mu\text{g}$ ) with a GasBench II preparation device, *Rapid Commun.*  
879 *Mass Spectrom.*, 25, 1910–1914, 2011.
- 880 Burns, S.J., McKenzie, J.A., and Vasconcelos, C.: Dolomite formation and biogeochemical  
881 cycles in the Phanerozoic, *Sedimentology*, 47, 49–61, 2000.
- 882 Breda, A. and Preto, N.: Anatomy of an Upper Triassic continental to marginal-marine  
883 system: the mixed siliciclastic–carbonate Travenanzes Formation (Dolomites, Northern  
884 Italy), *Sedimentology*, 58, 1613–1647, 2011.
- 885 Chilingar, G.V.: Relationship between Ca/Mg ratio and geological age, *AAPG Bull.*, 40,  
886 2256–2266, 1956.
- 887 Clayton, R.N., Jones, B.F., and Berner, R.A.: Isotope studies of dolomite formation under  
888 sedimentary conditions, *Geochim. Cosmochim. Acta*, 32, 415–432, 1968.
- 889 Cleveland, D.M., Nordt, L.C., and Atchley, S.C.: Paleosols, trace fossils, and precipitation  
890 estimates of the uppermost Triassic strata in northern New Mexico. *Palaeogeography,*  
891 *Palaeoclimatology, Palaeoecology*, 257, 421–444, 2008.
- 892 Court, W.M., Paul, A., and Lokier, S.W.: The preservation potential of environmentally  
893 diagnostic sedimentary structures from a coastal sabkha, *Marine Geology*, 386, 1–18,  
894 2017.
- 895 Czurda, K. and Nicklas, L.: Zur Mikrofazies und Mikrostratigraphie des Hauptdolomites und  
896 des Plattenkalk-Niveaus der Klostertaler Alpen und des Rhätikon (Nördliche Kalkalpen,  
897 Vorarlberg), In: *Festband 300 Jahre Geol. Inst. Univ. Innsbruck*, pp. 165–253, 1970.
- 898 Dal Corso, J., Mietto, P., Newton, R.J., Pancost, R.D., Preto, N., Roghi, G., and Wignall, P.B.  
899 Discovery of a major negative  $\delta^{13}\text{C}$  spike in the Carnian (Late Triassic) linked to the  
900 eruption of Wrangellia flood basalts, *Geology*, 40, 79–82, 2012.
- 901 Deelman, J.C.: Low-temperature nucleation of magnesite and dolomite, *Neues Jahrbuch für*  
902 *Mineralogie (Stuttgart), Monatshefte*, 7, 289–302, 1999.

## Sr-isotopes in Carnian primary dolomite

- 903 Demicco, R.V. and Hardie, L.A.: Sedimentary structures and early diagenetic features of  
904 shallow marine carbonate deposits, *SEPM Atlas, Ser.*, 1, 265, 1994.
- 905 DePaolo, D.J. and Ingram, B.: High-resolution stratigraphy with strontium isotopes. *Science*,  
906 227, 938–941, 1985.
- 907 De Zanche, V., Gianolla, P., Mietto, P., Siorpaes, C., and Vail, P.R.: Triassic sequence  
908 stratigraphy in the Dolomites (Italy), *Sci. Geol. Mem.*, 45, 1–27, 1993.
- 909 Doglioni, C.: Tectonics of the Dolomites (Southern Alps-Northern Italy), *J. Structural*  
910 *Geology*, 9, 181–193, 1987.
- 911 Eugster, H.P. and Hardie, L.A.: Saline lakes, In: A. Lerman (Ed): *Lakes, Chemistry, Geology,*  
912 *Physics.* Springer-Verlag, New York, N.Y., pp. 237-293, 1978.
- 913 Eugster, H.P. and Surdam, R.C.: Depositional environment of the Green River Formation of  
914 Wyoming: a preliminary report, *Bull. Geol. Soc. Am.*, 84, 1115-1120, 1973.
- 915 Fischer, A.G.: The Lofer cyclothems of the Alpine Triassic, *Kansas Geol. Surv. Bull.* 169,  
916 107–149, 1964.
- 917 Flügel, E.: *Microfacies of carbonate rocks - analysis, interpretation and application*, 2<sup>nd</sup>.  
918 Edition, Springer-Verlag Berlin Heidelberg, 2010.
- 919 Frisia, S.: Mechanisms of complete dolomitization in a carbonate shelf: comparison between  
920 the Norian Dolomia Principale (Italy) and the Holocene of Abu Dhabi Sabkha, In: A  
921 volume in honour of Dolomieu (Eds: B. Purser, M. Tucker, and D. Zenger), *Spec. Publs.*  
922 *Int. Ass. Sediment.*, 21, 55-74, 1994.
- 923 Frisia, S. and Wenk, H.-R.: TEM and AEM study of pervasive, multi-step dolomitization of  
924 the upper Triassic Dolomia Principale (Northern Italy), *J. Sed. Petrol.*, 63, 1049–1058,  
925 1993.
- 926 Füchtbauer, H. and Goldschmidt, H.: Beziehungen zwischen Calcium-Gehalt und  
927 Bildungsbedingungen der Dolomite, *Geologische Rundschau*, 55, 29–40, 1966.

## Sr-isotopes in Carnian primary dolomite

- 928 Gattolin, G., Breda, A., and Preto, N.: Demise of Late Triassic carbonate platforms triggered  
929 the onset of a tide-dominated depositional system in the Dolomites, Northern Italy,  
930 *Sedimentary Geology*, 297, 38–49, 2013.
- 931 Gattolin, G., Preto, N., Breda, A., Franceschi, M., Isottona, M., and Gianolla P.: Sequence  
932 stratigraphy after the demise of a high-relief carbonate platform (Carnian of the  
933 Dolomites): Sea-level and climate disentangled, *Palaeogeogr., Palaeoclimatol., Palaeoecol.*  
934 423, 1–17, 2015.
- 935 Garzanti, E., Gnaccolini, M., and Jadoul, F.: Anatomy of a semiarid coastal system: the Upper  
936 Carnian of Lombardy (Italy), *Riv. Ital. Paleontol. Stratigr.*, 101, 17–36, 1995.
- 937 Gianolla, P., De Zanche, V., and Mietto, P.: Triassic sequence stratigraphy in the Southern  
938 Alps (Northern Italy): definition of sequences and basin evolution, In: *Mesozoic and*  
939 *Cenozoic Sequence Stratigraphy of European Basins* (Eds. deGraciansky P.-C., J.  
940 Hardenbol, T. Jacquin and P.R. Vail), *SEPM Spec. Publ.*, 60, 719–747, 1998.
- 941 Ginsburg, R.N.: Landward movement of carbonate mud: new model for regressive cycles in  
942 carbonates (abs.), *AAPG Bull.*, 55, 340, 1971.
- 943 Given, R.K. and Wilkinson, B.H.: Dolomite abundance and stratigraphic age: constraints on  
944 rates and mechanisms of Phanerozoic dolostone formation: perspectives, *J. Sediment.*  
945 *Research*, 57, 1068–1078, 1987.
- 946 Gregg, J.M., Bish, D.L., Kaczmarek, S.E., and Machel, H.G.: Mineralogy, nucleation and  
947 growth of dolomite in the laboratory and sedimentary environment: A review,  
948 *Sedimentology* 62, 1749–1769, 2015.
- 949 Handy, M.R., Schmid, S.S., Bousquet, R., Kissling E., and Bernoulli, D.: Recoiling plate-  
950 tectonic reconstructions of Alpine Tethys with the geological-geophysical record of  
951 spreading and subduction in the Alps, *Earth-Science Reviews* 102, 121–158, 2010.
- 952 Hill, Jr., W.E., and Evans, D.R.: Solubility of twenty minerals in selected versene (EDTA)  
953 solutions. *State Geological Survey Kansas, Bull.* 175, pp. 22, 1965.

## Sr-isotopes in Carnian primary dolomite

- 954 Hsü, K.J. and Siegenthaler, C.: Preliminary experiments on hydrodynamic movement induced  
955 by evaporation and their bearing on the dolomite problem, *Sedimentology*, 12, 11–25,  
956 1969.
- 957 Hsü, K.J. and Schneider, J.: Progress report on dolomitization hydrology of Abu Dhabi  
958 Sabkhas, Arabian Gulf, The Persian Gulf. Springer, New York, pp. 409–422, 1973.
- 959 Iannace, A. and Frisia, S.: Changing dolomitization styles from Norian to Rhaetian in  
960 southern Tethys realm, In: A Volume in Honour of Dolomieu (Eds. B. Purser, M. Tucker  
961 and D. Zenger), *Int. Assoc. Sedimentol. Spec. Publ.*, 21, 75–89, 1994.
- 962 Illing, L.V., Wells, A.J. and Taylor, J.C.M.: Penecontemporary dolomite in the Persian Gulf,  
963 In: *Dolomitization and limestone diagenesis* (Eds L.C. Pray and L.C. Murray), *SEPM*  
964 *Spec. Publ.*, 13, 89–111, 1965.
- 965 Jones, B.F.: The hydrology and mineralogy of Deep Springs Lake, Inyo County, California,  
966 *US Geol. Surv. Prof. Paper*, 502-A, 56, 1965.
- 967 Korte, C., Kozur, H.W., Bruckschen, P., and Veizer, J.: Strontium isotope evolution of Late  
968 Permian and Triassic seawater, *Geochim. Cosmochim. Acta* 67, 47–62, 2003.
- 969 Kraus, O.: Die Raibler Schichten des Drauzuges (Südliche Kalkalpen), *Lithofazielle,*  
970 *sedimentpetrographische und paläogeographische Untersuchungen. Jb. Geol. B.-A.*, 112,  
971 81–152, 1969.
- 972 Land, L.S.: Failure to precipitate dolomite at 25°C from dilute solution despite 1000-fold  
973 oversaturation after 32 years, *Aquat. Geochem.*, 4, 361–368, 1998.
- 974 Last, W.M.: Lacustrine dolomite – an overview of modern, Holocene, and Pleistocene  
975 occurrences, *Earth-Science Reviews*, 27, 221–263, 1990.
- 976 Liu, D., Xu, Y., Papineau, D., Yub, N., Fan, Q., Qiu, X., and Wang, H.: Experimental  
977 evidence for abiotic formation of low-temperature proto-dolomite facilitated by clay  
978 minerals, *Geochim. Cosmochim. Acta*, 247, 83–95, 2019.

## Sr-isotopes in Carnian primary dolomite

- 979 Lumsden, D.N.: Discrepancy between thin-section and X-ray estimates of dolomite in  
980 limestone, *J. Sed. Petrol.*, 49, 429–435, 1979.
- 981 Machel, H.G.: Concepts and models of dolomitization: a critical reappraisal. Geological  
982 Society, London, Special Publications, 235, 7–63, 2004.
- 983 Mather, C.C., Skrzypek, G., Dogramaci, S., and Grierson, P.F.: Paleoenvironmental and  
984 paleohydrochemical conditions of dolomite formation within a saline wetland in arid  
985 northwest Australia, *Quaternary Science Reviews*, 185, 172–188, 2018.
- 986 McArthur, J.M., Howarth, R.J., and Shield, G.A.: Strontium isotope stratigraphy. The  
987 geologic time scale, 2012, In: Gradstein, F.M., Ogg, J.G., Schmotz, M.D. and Ogg, G.M.  
988 (eds.), Elsevier, 1 of 2, 1144 pp, 2012.
- 989 McCormack, J., Bontognali, T.R.R., Immenhauser, A., and Kwiecien, O.: Controls on cyclic  
990 formation of Quaternary early diagenetic dolomite, *Geophysical Research Letters*, 45,  
991 3625–3634, 2018.
- 992 McKenzie, J.: Holocene dolomitization of calcium carbonate sediments from the coastal  
993 sabkhas of Abu Dhabi, U.A.E.. *J. Geol.*, 89, 185–198, 1981.
- 994 McKenzie, J., Hsü, K.J., and Schneider, J.F.: Movement of subsurface waters under the  
995 sabkha, Abu Dhabi, UAE and its relation to evaporative dolomite genesis. *Spec. Publ.-*  
996 *SEPM*, 28, 11–30, 1980.
- 997 Meister, P., Bernasconi, S., McKenzie, J.A., Vasconcelos, C., Frank, M., Gutjahr, M., and  
998 Schrag, D., Dolomite formation in the dynamic deep biosphere: Results from the Peru  
999 Margin (ODP Leg 201), *Sedimentology*, 54, 1007–1032, 2007.
- 1000 Meister, P., Reyes, C., Beaumont, W., Rincon, M., Collins, L., Berelson, W., Stott, L.,  
1001 Corsetti, F., and Nealson, K.H.: Calcium- and magnesium-limited dolomite precipitation at  
1002 Deep Springs Lake, California, *Sedimentology*, 58, 1810–1830, 2011.
- 1003 Meister, P., McKenzie, J.A., Bernasconi, S.M., and Brack, P.: Dolomite formation in the  
1004 shallow seas of the Alpine Triassic, *Sedimentology*, 60, 270–291, 2013.

## Sr-isotopes in Carnian primary dolomite

- 1005 Meister, P., Frisia, S.: Dolomite formation by nano-crystal aggregation in the Dolomia  
1006 Principale of the Brenta Dolomites (northern Italy). *Rivista Italiana di Stratigrafia e*  
1007 *Paleontologia*, under revision.
- 1008 Missana, T., Garcia-Gutierrez, M., and Alonso, U.: Sorption of strontium onto illite/smectite  
1009 mixed clays, *Physics and Chemistry of the Earth*, 33, 156–162, 2008.
- 1010 Moore, D.M. and Reynolds, R.C.: X-ray diffraction and the identification and analysis of clay  
1011 minerals, Oxford University Press, New York, 378 p, 1997.
- 1012 Müller, D.W., Mueller, P.A., and McKenzie, J.A.: Strontium isotopic ratios as fluid tracers in  
1013 Messinian evaporites of the Tyrrhenian Sea (western Mediterranean Sea), In: Kastens,  
1014 K.A., Mascle, J., et al., *Proc. ODP, Sci. Results*, 107: College Station, TX (Ocean Drilling  
1015 Program), 603–614, 1990a.
- 1016 Müller, D.W., McKenzie, J.A., and Mueller, P.A.: Abu Dhabi sabkha, Persian Gulf, revisited:  
1017 application of strontium isotopes to test an early dolomitization model, *Geology*, 18, 618–  
1018 621, 1990b.
- 1019 Muttoni, G., Kent, D.V., Garzanti, E., Brack, P., Abrahamsen, N., and Gaetani, M.: Early  
1020 Permian Pangea 'B' to Late Permian Pangea 'A', *Earth Planet. Sci. Lett.*, 215, 379–394,  
1021 2003.
- 1022 Neri, C., Gianolla, P., Furlanis, S., Caputo, R., and Bosellini, A.: Note illustrative della Carta  
1023 Geologica d'Italia alla scala 1:50.000, Foglio 029 Cortina d'Ampezzo, A.P.A.T. System  
1024 Cart, Roma, 200 pp, 2007.
- 1025 Neuhuber, S., Steier, P., Gier, S., Draganits, E., and Kogelbauer, I.: Radiogenic Carbon  
1026 Isotopes in Authigenic Carbonate from Lake Neusiedl, Austria, *Geophysical Research*  
1027 *Abstracts*, 17, 15399–15399, 2015.
- 1028 Ogg, J.G.: Triassic, In: Gradstein, F. M., Ogg, J. G., Schmitz, M., and Ogg, G. (Eds.), *The*  
1029 *geologic time scale 2012*, Elsevier, Cambridge University Press, Cambridge, 681–730,  
1030 2012.



## Sr-isotopes in Carnian primary dolomite

- 1031 Perri, E., Tucker, M.E., Słowakiewicz, M., Whitaker, F., Bowen, L., and Perrotta, I.D.:  
1032 Carbonate and silicate biomineralization in a hypersaline microbial mat (Mesaieed sabkha,  
1033 Qatar): Roles of bacteria, extracellular polymeric substances and viruses, *Sedimentology*,  
1034 65, 1213–1245, 2018.
- 1035 Peterson, M.N.A., Bien, G.S., and Berner, R.A.: Radiocarbon studies of recent dolomite from  
1036 Deep Springs Lake, California. *J. Geophys. Res.*, 68, 6493–6505, 1963.
- 1037 Preto, N. and Hinnov, L.A.: Unravelling the origin of shallow-water cyclothems in the Upper  
1038 Triassic Dürrenstein Formation (Dolomites, Italy). *J. Sed. Res.*, 73, 774–789, 2003.
- 1039 Preto, N., Breda, A., Corso, J. D., Spötl, C., Zorzi, F., and Frisia, S.: Primary dolomite in the  
1040 Late Triassic Travenanzes Formation, dolomites, Northern Italy: facies control and  
1041 possible bacterial influence, *Sedimentology*, 62, 697–716, 2015.
- 1042 Randazzo, A.F. and Zachos, L.G.: Classification and description of dolomitic fabrics of rocks  
1043 from the Floridan aquifer, U.S.A. *Sediment. Geol.*, 37, 151–162, 1983.
- 1044 Ratschbacher, L., Merle, O., Davy, P., and Cobbold, P.: Lateral extrusion in the Eastern Alps,  
1045 Part 1: Boundary conditions and experiments scaled for gravity, *Tectonics*, 10, 245–256,  
1046 1991.
- 1047 Reinhardt, L. and Ricken, W.: The stratigraphic and geochemical record of Playa Cycles:  
1048 monitoring a Pangaeon monsoon-like system (Triassic, Middle Keuper, S. Germany),  
1049 *Palaeogeogr., Palaeoclimatol., Palaeoecol.*, 161, 205–227, 2000.
- 1050 Rodriguez-Blanco, J.D., Shaw, S., and Benning, L.G.: A route for the direct crystallization of  
1051 dolomite, *American Mineralogist*, 100, 1172–1181, 2015.
- 1052 Rosen, M.R., Miser, D.E., Starcher, M.A., and Warren, J.K.: Formation of dolomite in the  
1053 Coorong region, South Australia, *Geochim. Cosmochim. Acta*, 53, 661–669, 1989.
- 1054 Rosenbaum J. and Sheppard S.M.: An isotopic study of siderites, dolomites and ankerites at  
1055 high temperatures, *Geochim. Cosmochim. Acta* 50, 1147–1150, 1986.

## Sr-isotopes in Carnian primary dolomite

- 1056 Russo, F., Neri, C., Mastandrea, A., and Baracca, A.: The mud mound nature of the Cassian  
1057 Platform Margins of the Dolomites A case history: the Cipit boulders from Punta  
1058 Grohmann (Sasso Piatto Massif, northern Italy), *Facies*, 36, 25–36, 1997.
- 1059 Sánchez-Román, M., Vasconcelos, C., Warthmann, R., Rivadeneyra, M.A., and McKenzie,  
1060 J.A.: Microbial dolomite precipitation under aerobic conditions: results from Brejo do  
1061 Espinho Lagoon (Brazil) and culture experiments, *Int. Assoc. Sediment. Spec. Publ.*, 40,  
1062 167–178, 2009.
- 1063 Sánchez-Román, M., McKenzie, J.A., Rebello Wagener, A., Romanek, C.S., Sánchez-Navas,  
1064 A., and Vasconcelos, C.: Experimentally determined biomediated Sr partition coefficient  
1065 for dolomite: Significance and implication for natural dolomite, *Geochim. Cosmochim.*  
1066 *Ac.*, 75, 887–904, 2011.
- 1067 Seegis, D.: Die Lehrbergschichten im Mittleren Keuper von Süddeutschland: Stratigraphie,  
1068 Petrographie, Paläontologie, Genese, Hennecke, Remshalden, 382 pp, 1997.
- 1069 Stampfli, G.M. and Borel, G.D.: A plate tectonic model for the Paleozoic and Mesozoic  
1070 constrained by dynamic plate boundaries and restored synthetic oceanic isochrons, *Earth*  
1071 *Planet. Sci. Lett.*, 196, 17–33, 2002.
- 1072 Teal, C.S., Mazzullo, S.J., and Bischoff, W.D.: Dolomitization of Holocene shallow-marine  
1073 deposits mediated by sulfate reduction and methanogenesis in normal-salinity seawater,  
1074 northern Belize, *J. Sediment. Research*, 70, 649–663, 2000.
- 1075 Vahrenkamp, V.C. and Swart, P.K.: New distribution coefficient for the incorporation of  
1076 strontium into dolomite and its implications for the formation of ancient dolomites,  
1077 *Geology*, 18, 387–391, 1990.
- 1078 Van Tuyl, F.M.: The origin of dolomite, *Annual Report 1914, Iowa Geological Survey*, XXV,  
1079 257–421, 1914.

- 1080 Vasconcelos, C., McKenzie, J.A., Warthmann, R., and Bernasconi, S.: Calibration of the  $\delta^{18}\text{O}$   
1081 paleo-thermometer with dolomite formed in microbial cultures and natural environments.  
1082 *Geology*, 33, 317–320, 2005.
- 1083 Vasconcelos, C., Warthmann, R., McKenzie, J.A., Visscher, P.T., Bittermann, A.G., and van  
1084 Lith, Y.: Lithifying microbial mats in Lagoa Vermelha, Brazil: Modern Precambrian  
1085 relics? *Sedimentary Geology*, 185, 175–183, 2006.
- 1086 Veizer, J., Ala, D., Azmy, K., Bruckschen, P., Buhl, D., Bruhn, F., Carden, G.A.F., Diener,  
1087 A., Ebner, S., Godderis, Y., Jasper, T., Korte, C., Pawellek, F., Podlaha, O.G., and  
1088 Strauss, H.:  $^{87}\text{Sr}/^{86}\text{Sr}$ ,  $\delta^{13}\text{C}$  and  $\delta^{18}\text{O}$  evolution of Phanerozoic seawater, *Chemical geology*,  
1089 161, 59–88, 1999.
- 1090 Von der Borch, C.C.: Stratigraphy and formation of Holocene dolomitic carbonate deposits of  
1091 the Coorong area, South Australia, *J. Sediment. Research*, 46, 952–966, 1976.
- 1092 Von der Borch, C.C., Lock, D.E., and Schwebel, D.: Ground-water formation of dolomite in  
1093 the Coorong region of South Australia, *Geology*, 3, 283–285, 1975.
- 1094 Warren, J.: Sedimentology and mineralogy of dolomitic Coorong Lakes, South Australia, *J.*  
1095 *Sedimentary Petrol.*, 60, 843–858, 1990.
- 1096 Warren, J.: Dolomite: occurrence, evolution and economically important associations, *Earth-*  
1097 *Science Reviews*, 52, 1–81, 2000.
- 1098 Wenk, H.R., Meisheng, H., and Frisia, S.: Partially disordered dolomite: microstructural  
1099 characterization of Abu Dhabi sabkha carbonates, *Am. Mineral.*, 78, 769–774, 1993.

1100

### 1101 **Figure Captions**

1102 **Figure 1. (a)** Palaeogeographic map of the Southern Alpine to Germanic domains during the  
1103 middle Triassic, reproduced from Brack et al. (1999; modified). Bal: Balaton; BG: Burgundy  
1104 Gate; Car: Carnian Alps; ECG: eastern Carpathian Gate; Lomb: Lombardy; NCA: Northern  
1105 Calcareous Alps; SMG: Silesian Moravian Gate. Inset: Tectonic map of the Southern Alps

## Sr-isotopes in Carnian primary dolomite

1106 (Brack et al., 1996, modified) showing the sampling location at Rifugio Dibona. GL:  
1107 Giudicarie Line; PL: Pustertal Line; VL: Val Sugana Line. (b) ~~Stratigraphy of the middle to~~  
1108 ~~late Triassic in~~ Venetian Alps, showing a transition in geometries from basin and platform  
1109 topography during the Lower Carnian to an extended alluvial to tidal plain in this Upper  
1110 Carnian. The shaded area indicates the Travenanzes Fm., showing a lateral transition in facies  
1111 and a transgressive boundary to the Dolomia Principale. Compiled from Breda and Preto  
1112 (2011), after De Zanche et al. (1993), modified.

1113

1114 **Figure 2.** Stratigraphic section at Rifugio Dibona: (a) Complete section modified after Breda  
1115 and Preto (2011); (a) detailed section of uppermost part of the clay-rich interval, showing  
1116 sampling locations. (c) Outcrop photograph showing the uppermost grey part of the clay-rich  
1117 interval with the location of the profile shown in (b).

1118

1119 **Figure 3.** Outcrop images of different types of dolomite intercalated in red and grey clay of  
1120 the Travenanzes Fm. at Rifugio Dibona: (a) Homogeneous dolomite bed (15 cm thick; 33 m).  
1121 (b) Upper part: dolomite nodules embedded in red clay, crosscut by green coloured cracks as  
1122 part of a calcic vertisol (95 m). (c) Laminated dolomite (110-112 m) in grey clay. (d) Bed  
1123 with gypsum nodules, and cracks filled with gypsum, at 50 m; (e) Dolomite-cemented  
1124 conglomerate bed at 75 m. (f) Laminated bed showing soft sediment deformation (106 m); an  
1125 isoclinal synsedimentary fold is indicated by the arrow. (g) Laminated dolomite showing  
1126 folding of the laminae due to soft sediment deformation (same bed as in f).

1127

1128 **Figure 4.** Photomicrographs of thin sections of dolomites of the Travenanzes Fm.: (a)  
1129 Rounded mud clasts embedded in dolomicrite matrix. The larger mm-size intraclast in the  
1130 upper left side of the image (arrow) consists itself of matrix with darker embedded mudclasts  
1131 (sample TZ16-St1; 104 m). (b) Mud clasts in dolomicrite matrix. Mudclasts are deformed and

1132 layers of coarser and finer matrix are equally affected by plastic deformation (sample TZ16-  
 1133 22; 120 m). (c, d) Pseudomorphs after gypsum in fine-grained dolomudstone (arrows). (e)  
 1134 Oolitic grainstone (sample TZ14-4; 64 m). The cortices consist of microcrystalline dolomite  
 1135 lacking a radial structure. Some show a concentric structure (arrow). (f) Laminated dolomite  
 1136 showing pseudo-teepee structures (arrow). Vertical cracks are often, but not always,  
 1137 associated with pseudo-teepees (sample TZ14-10; 107 m). Some coarser grained laminae may  
 1138 contain microsparite and peloids (P). (g) Laminated dolomite showing both plastic and brittle  
 1139 deformation of laminae. A cm-scale pseudo-teepee occurs in the centre of the image (sample  
 1140 TZ 16-21; 107 m). (h, i) Closeup of graded lamina in (g) showing plastic deformation. The  
 1141 top of the lamina shows an erosion surface with small rip-up clasts (arrow), overlain by a  
 1142 coarser layer.

1143  
 1144 **Figure 5.** SEM images of dolomites in backscatter mode: (a) Overview showing layer  
 1145 enriched in celestine inclusions (bright areas) in dolomite (Sample TZ14-9d; 95 m); (b)  
 1146 Celestine inclusion with barite in the centre (same sample as in a); (c) Barite crystals in  
 1147 dolomicrite (sample TZ14-4; 65 m).

1148  
 1149 **Figure 6.** SEM images of dolomites in backscatter mode showing different types of crystal  
 1150 shape: (a) Spheroidal growth of dolomite (darker areas) in clay layers (brighter areas; sample  
 1151 TZ14-9d; 95 m). (b) Closeup of a. (c) Dolomite crystals showing a porous interior domain but  
 1152 homogeneous syntaxial cement rims (sample TZ14-12; 90 m). (d) Similar as in (c); sample  
 1153 TZ14-9d; 95 m).

1154  
 1155 **Figure 7.** X-ray diffraction patterns: (a) Bulk analyses of homogeneous dolomite (Samples  
 1156 TZ14-1, TZ14-7, and TZ14-9); main peaks and ordering peaks are labelled with (hkl) indices.  
 1157 (b-d) Clay mineral separates of samples TZ14-1, TZ14-7 and TZ14-9, air dried (N), saturated

1158 with ethylene glycol (EG), and heated to 550°C (T); d-values in Å. In the ethylene-glycol  
1159 saturated sample TZ14-9 ~~the illite-smectite mixed-layer is best seen~~. The arrow points at the  
1160 expandable (smectite) part of the mixed-layer.

1161

1162 **Figure 8.** (a) Carbon/oxygen isotope cross-plot. (b) Oxygen isotope values through the  
1163 stratigraphic section.

1164

1165 **Figure 9.** Element concentrations in sequentially extracted fractions of bulk dolomite and  
1166 clay samples of the Travenanzes Fm.: (a) Ca vs. Mg; (b) Sr vs. K.

1167

1168 **Figure 10.** Comparison of Sr-isotopes in dolomites of the Travenanzes Fm. with Carnian  
1169 seawater curve (Korte et al., 2003). The 2-sigma uncertainties are smaller than the symbol  
1170 size.

1171

1172 **Figure 11.** Sr-isotope values from dolomites of different modern and ancient environments:  
1173 Travenanzes Fm. in the Dolomites, Southern Alps; Germanic Keuper (Weser Formation and  
1174 Arnstadt Formation); Coorong Lagoon; Deep Springs Lake.  $^{87}\text{Sr}/^{86}\text{Sr}$  ratios of modern  
1175 seawater are from DePaolo and Ingram (1985).

1176

## 1177 TABLES

1178 **Table 1.** ~~Compilation of~~ sedimentary structures from thin section analysis of dolomites from  
1179 the Travenanzes Fm. at the Dibona section.

1180

1181 **Table 2.** Relative abundances and ordering parameters of dolomites from the Travenanzes  
1182 Formation. Relative abundances were estimated based on the 104 peak height. The  
1183 stoichiometry  $\text{Mg}/(\text{Ca}+\text{Mg})$  was determined from the shift of the 104 peak using the equation

## Sr-isotopes in Carnian primary dolomite

1184 of Lumsden (1979). The structural ordering was calculated from the ratio of the 015 ordering  
1185 peak to the 110 peak according to Füchtbauer and Goldschmidt (1966).

1186

1187 **Table 3.** Total inorganic and organic carbon (TIC, TOC) contents of clay samples from the  
1188 Travenanzes Formation.

1189

1190 **Table 4.** Carbon and oxygen isotope values of different types of dolomite from the  
1191 Travenanzes Formation.

1192

1193 **Table 5.** Element concentrations of leacheates from dolomites and clays used for Sr-isotope  
1194 analysis.

1195

1196 **Table 6.** Compiled  $^{87}\text{Sr}/^{86}\text{Sr}$  ratios of sequentially leached dolomites from different locations,  
1197 clays and test minerals using different extraction solutions.

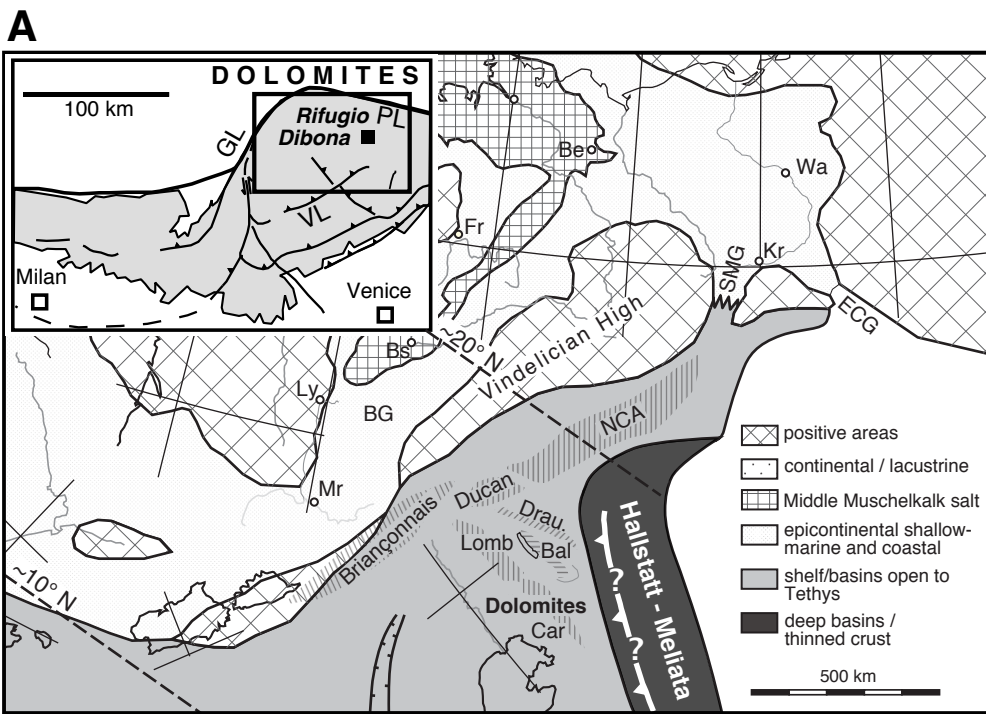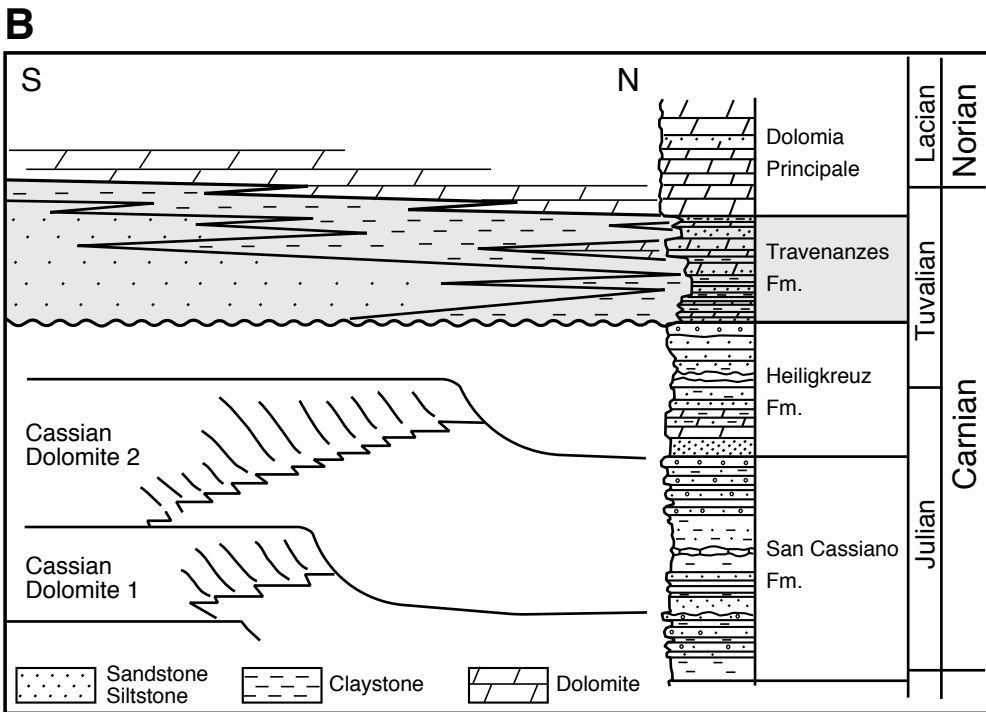

Figure 1



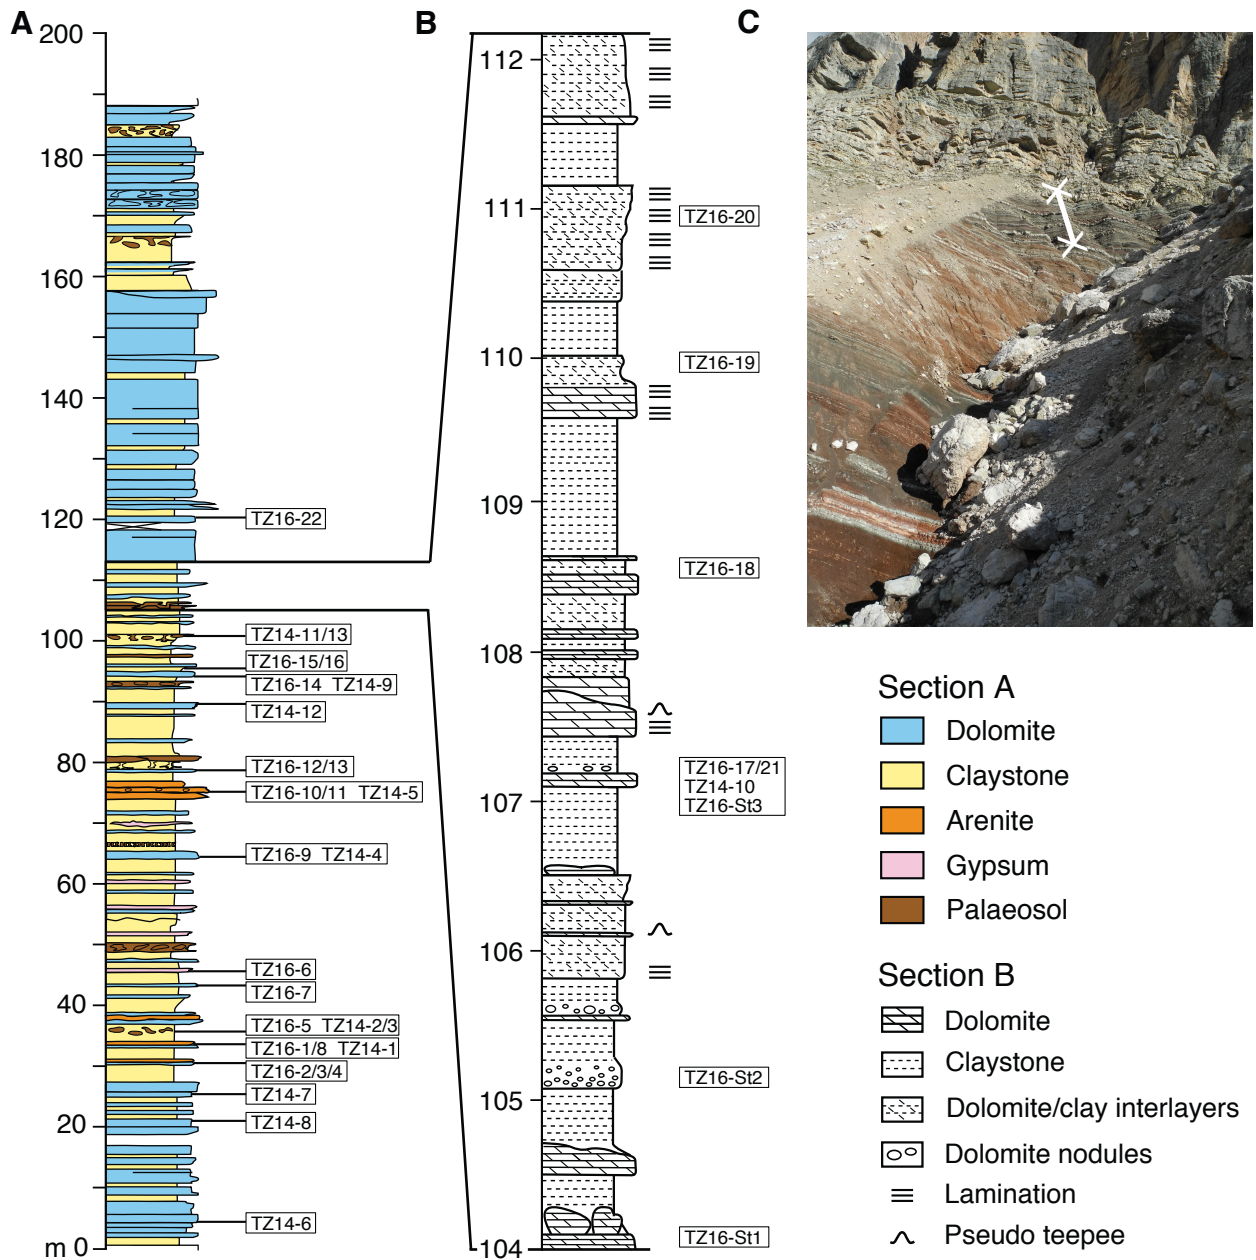

Figure 2

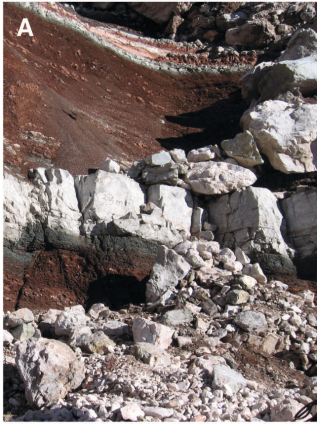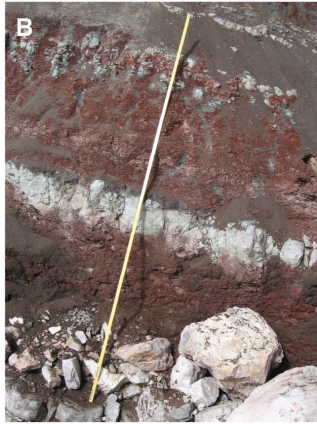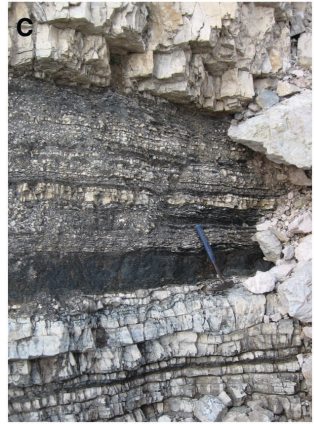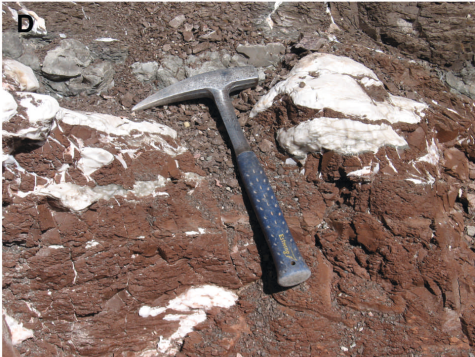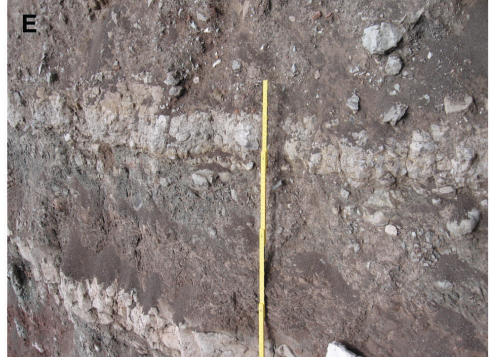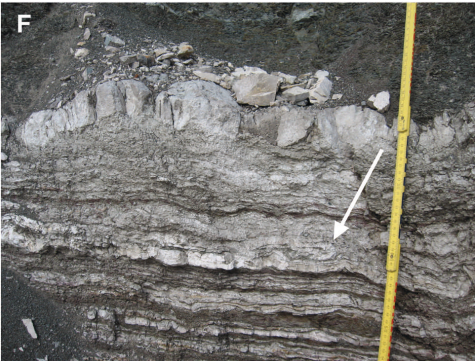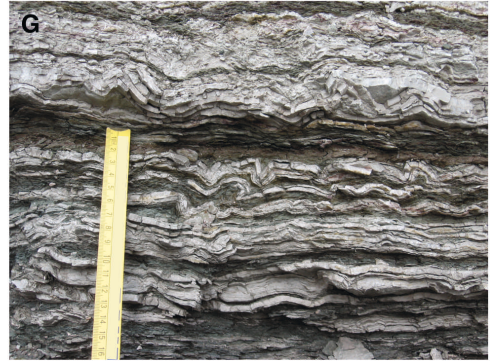

Figure 3

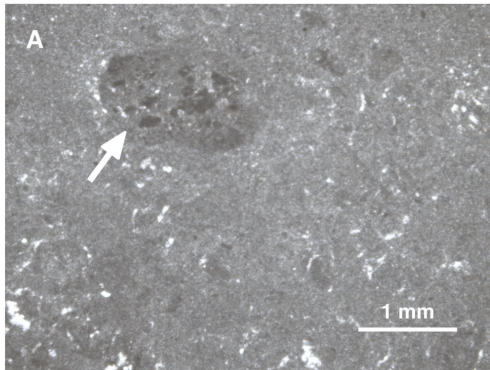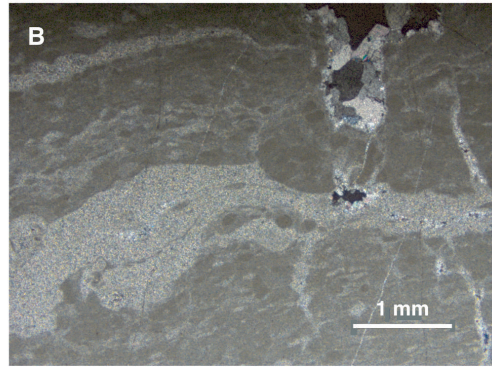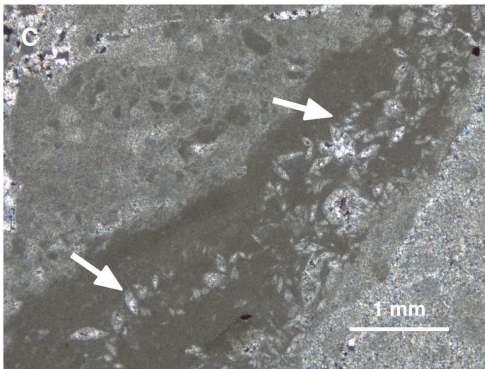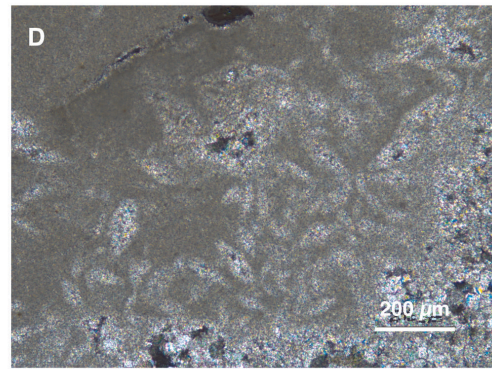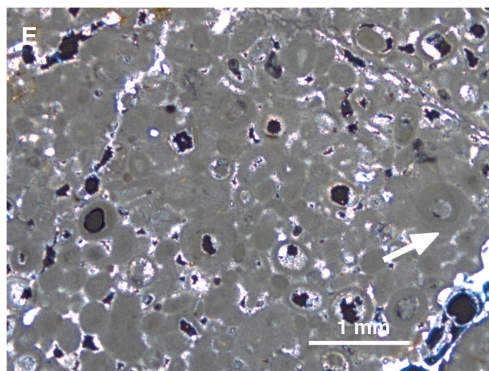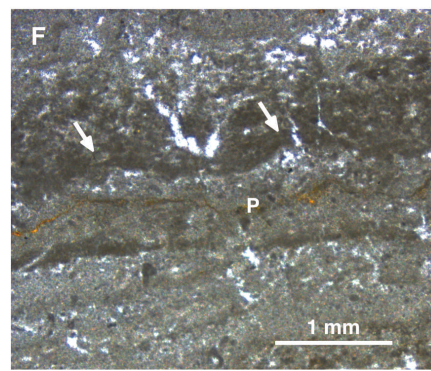

Figure 4

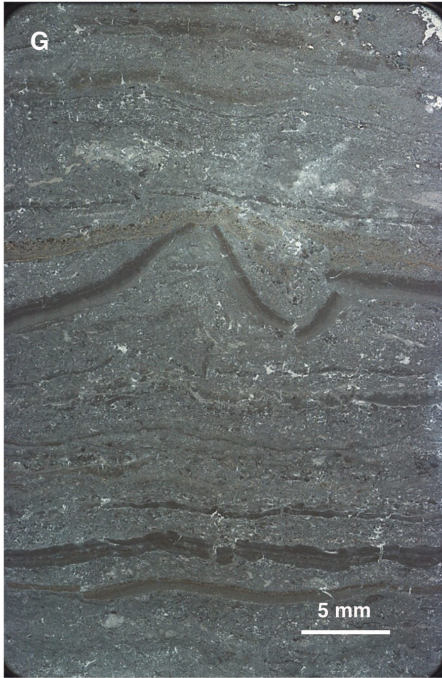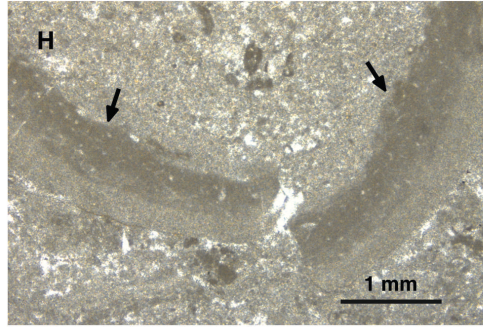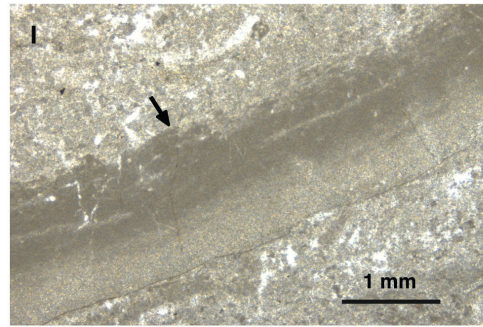

Figure 4 continued

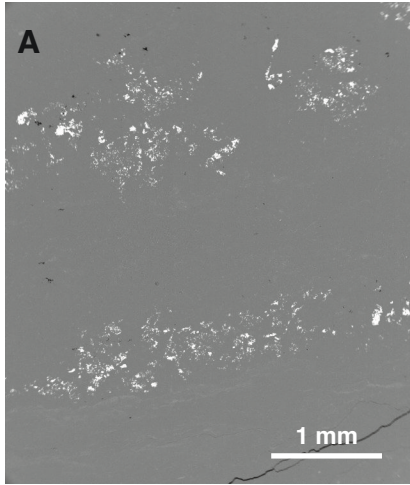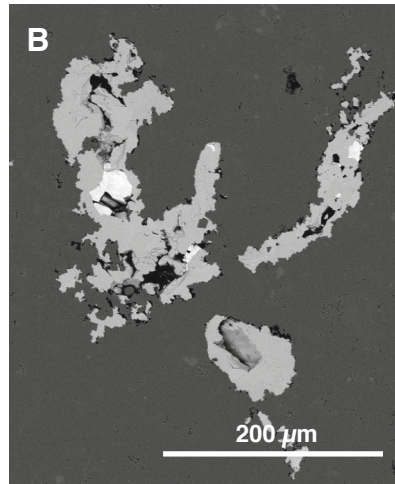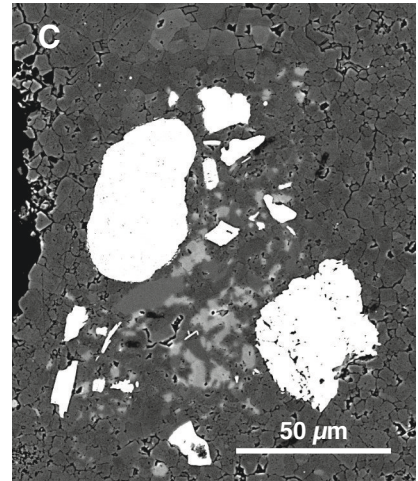

Figure 5

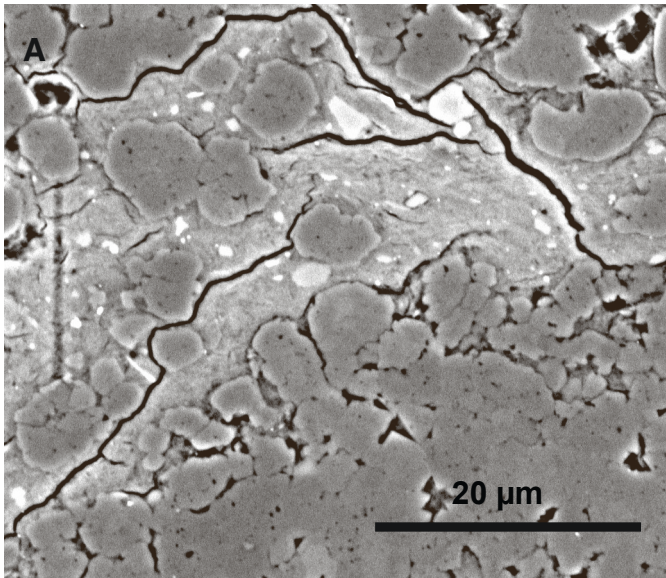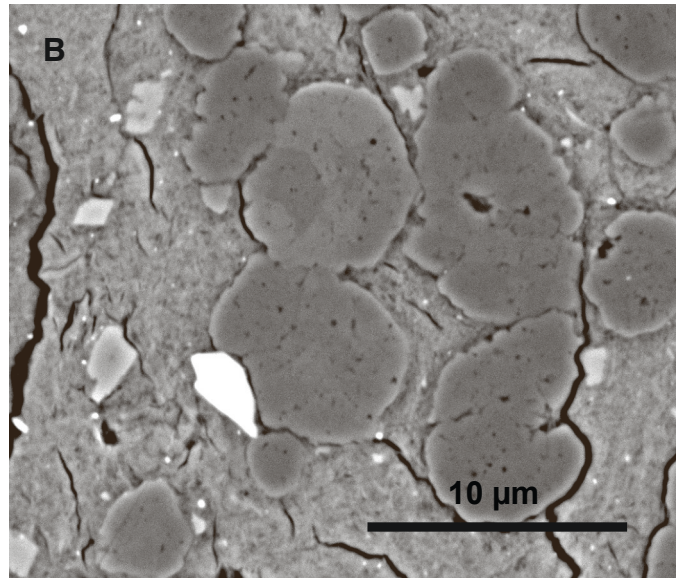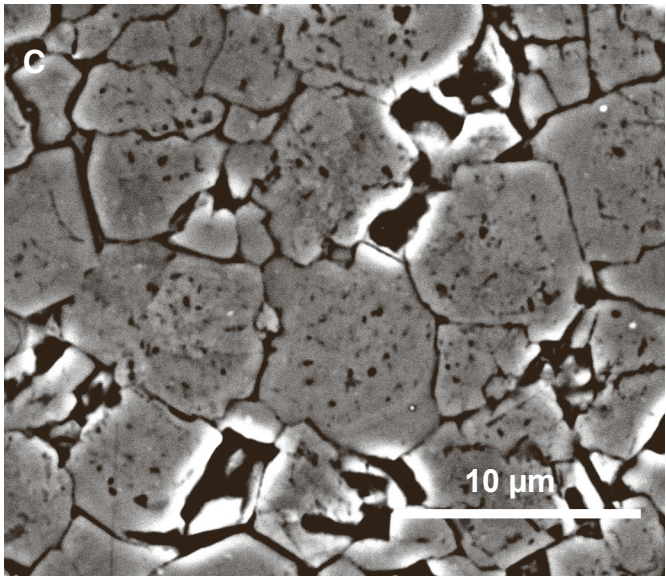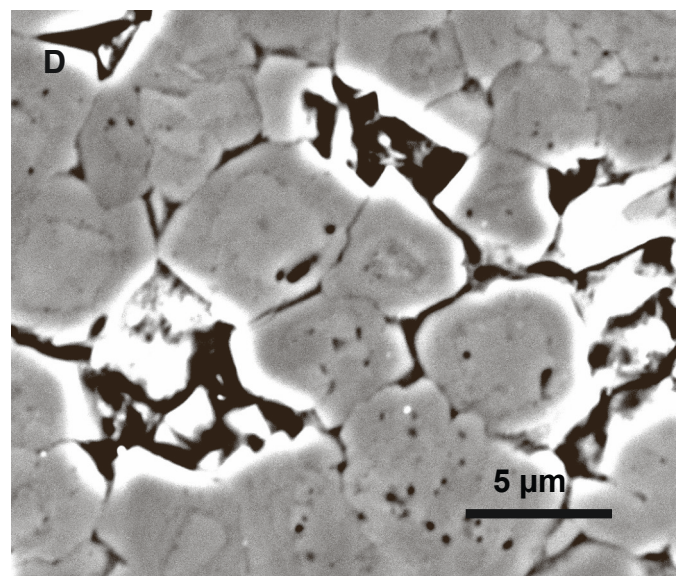

Figure 6

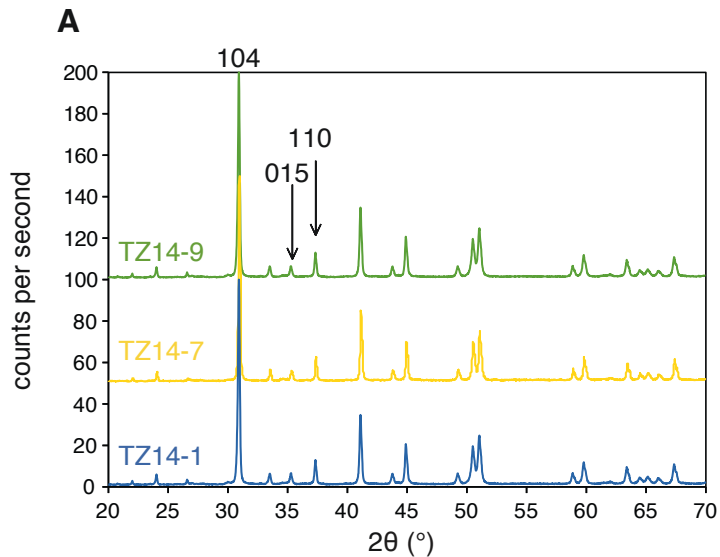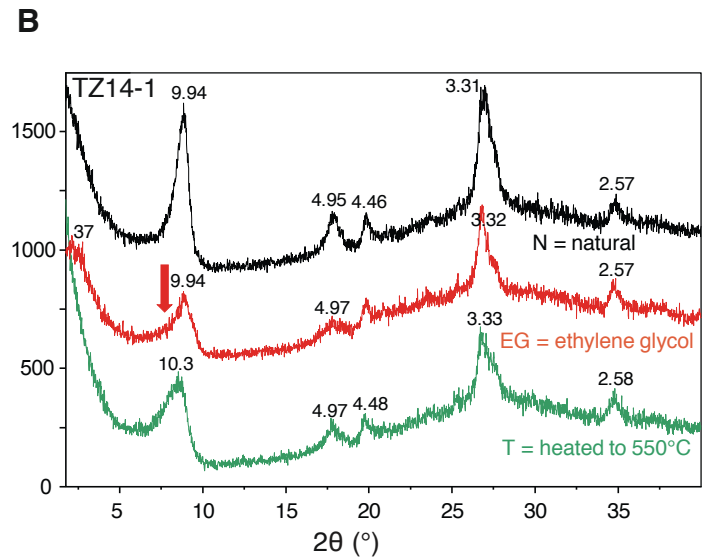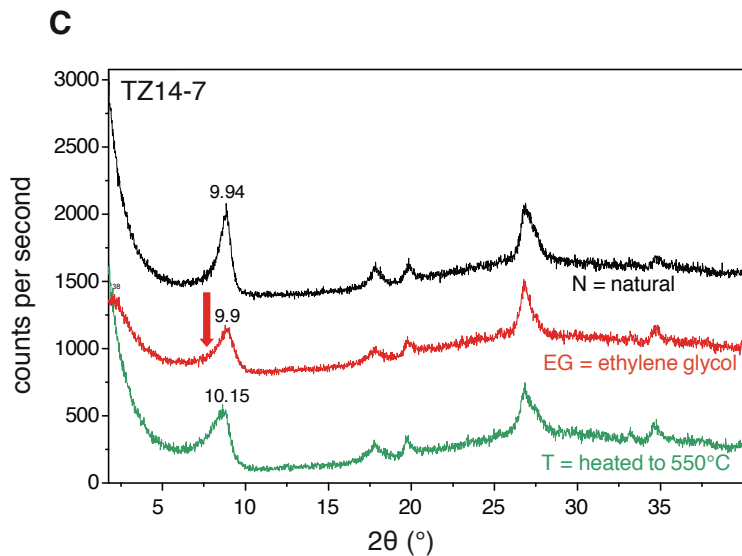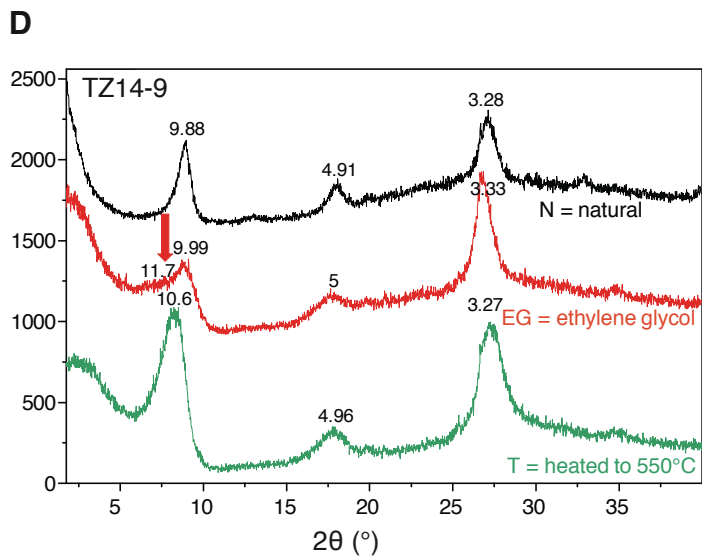

Figure 7

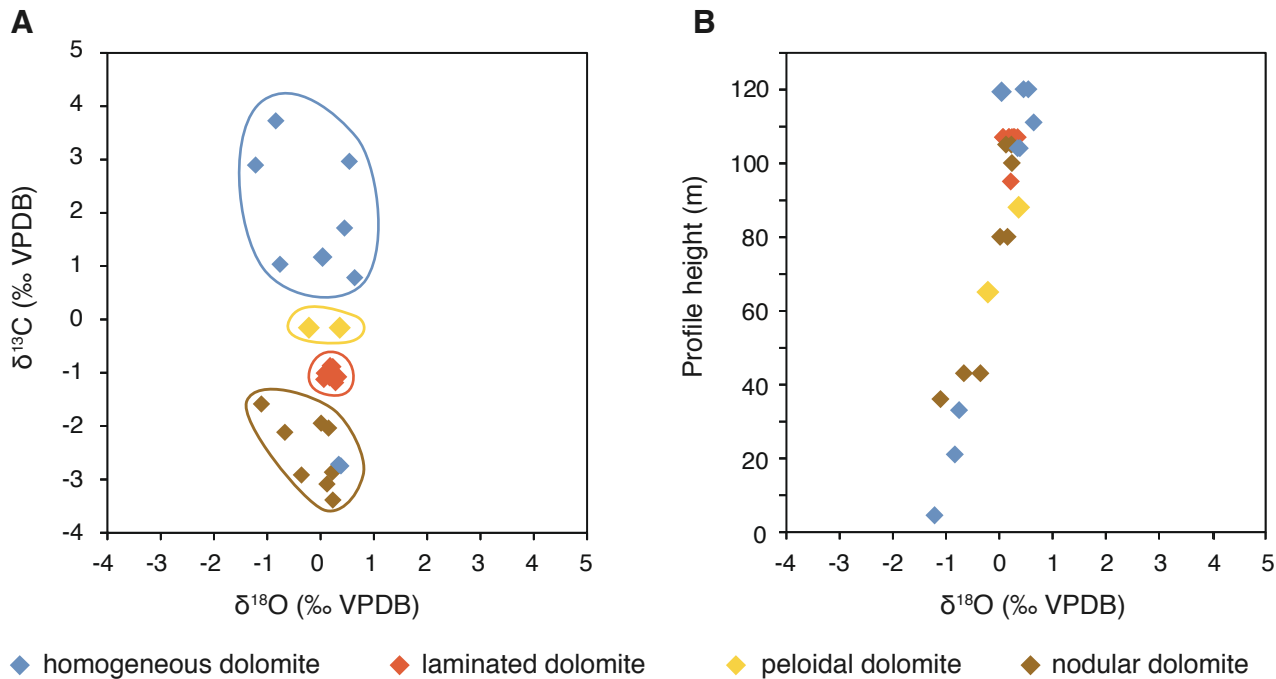

Figure 8



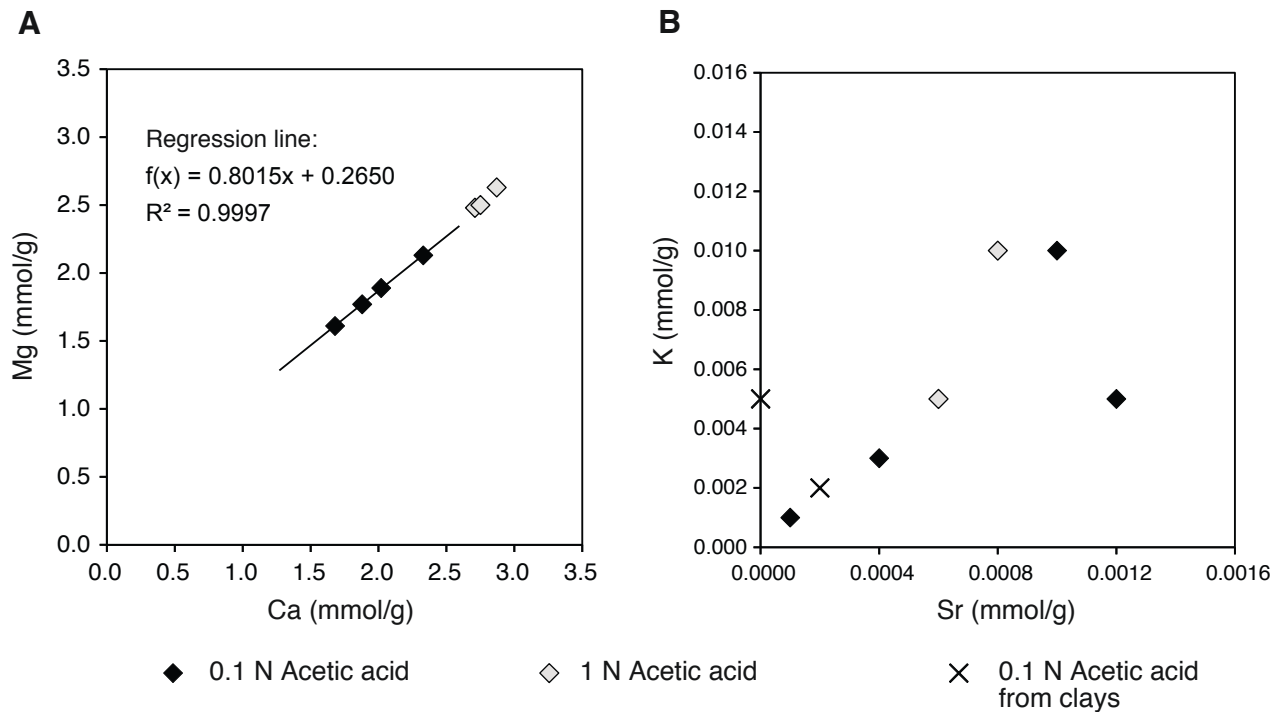

Figure 9

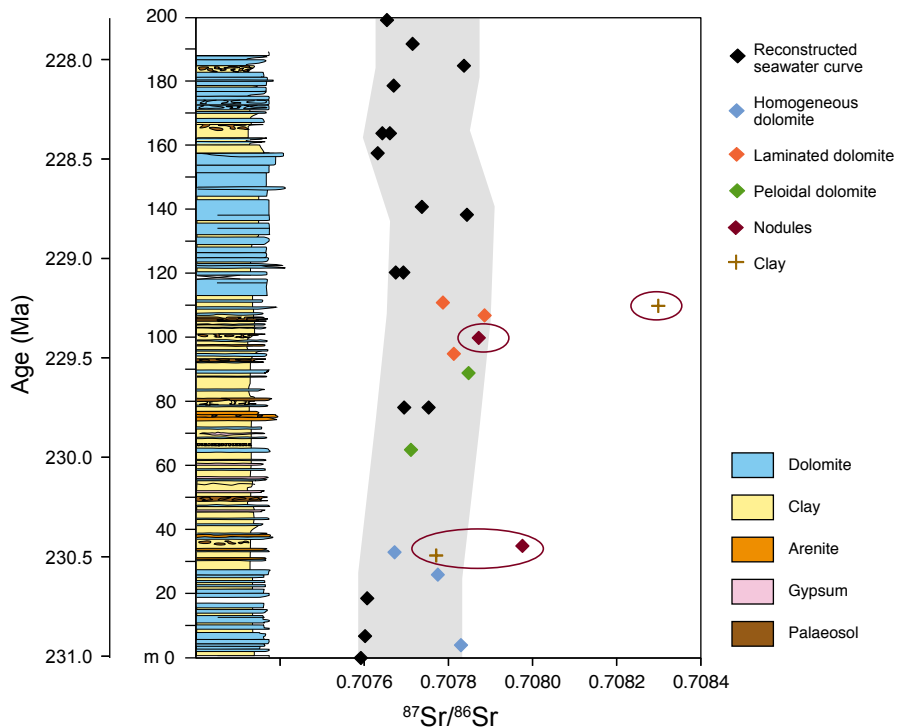

Figure 10

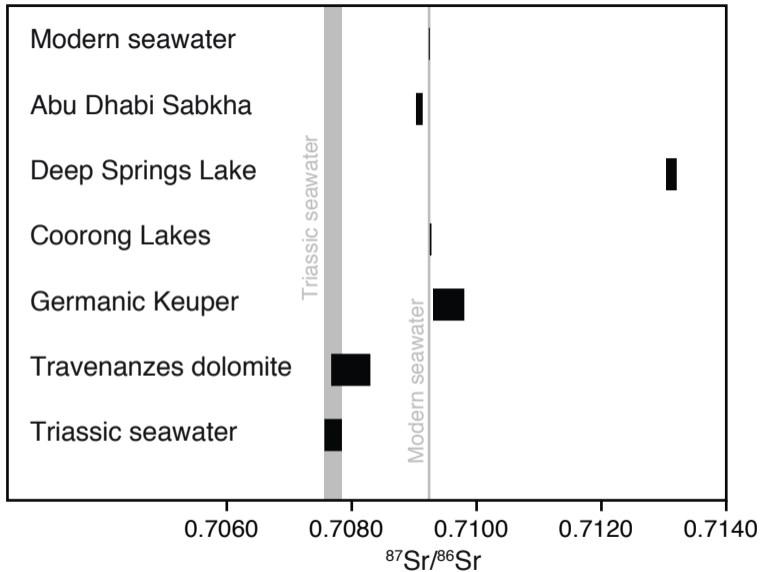

Figure 11

Table 1

| Macroscopic Description                      | Height | Samples |              | Matrix       |            |                       | Allochems             |                     |              |                |       |               |               | Sedimentary structures |                |               |                  | Porosity           |                 | Deformation               |                     | SMF** |
|----------------------------------------------|--------|---------|--------------|--------------|------------|-----------------------|-----------------------|---------------------|--------------|----------------|-------|---------------|---------------|------------------------|----------------|---------------|------------------|--------------------|-----------------|---------------------------|---------------------|-------|
|                                              |        | 2014    | 2016         | Aphano-topic | Micro-spar | Cavity-filling cement | Undeform. mud clasts* | Deformed mud clasts | Flat pebbles | Packed peloids | Ooids | Quartz clasts | Bioclasts     | Lamination             | Graded Bedding | Pseudo-Teepee | Erosion surfaces | Fenestral Porosity | Moldic porosity | Soft sediment deformation | Brittle deformation |       |
| dolomite with pyrite laminated dolomite/clay | 120.0  |         | TZ16-22      | +            | +          | +                     | ++                    | +                   | -            | +              | -     | -             |               | +                      | -              | -             | +                | +                  | +               | +                         | ++                  | 25    |
| laminated dolomite                           | 111.0  | TZ14-11 | TZ16-20      | ++           | +          | +                     | +                     | ±                   | +            | ±              | -     | -             |               | ++                     | +              | +             | ±                | -                  | -               | +                         | ++                  | 25    |
| laminated dolomite                           | 107.0  | TZ14-10 | TZ16-21/St-3 | +            | +          | +                     | +                     | ±                   | -            | +              | -     | -             |               | ++                     | +              | +             | ++               | +                  | -               | +                         | +                   | 25    |
| laminite                                     | 107.0  |         | TZ16-17      | ++           | +          | -                     | +                     | +                   | +            | -              | -     | +             |               | ±                      | ±              | -             | -                | +                  | ++              | +                         | +                   | 25    |
| dolomite nodule                              | 105.0  |         | TZ16-St-2    | ++           | +          | -                     | +                     | +                   | ±            | -              | -     | -             |               | -                      | -              | -             | -                | -                  | -               | +                         | +                   | diag. |
| homogeneous dolomite                         | 104.0  |         | TZ16-St-1    | ++           | +          | ±                     | +                     | ±                   | -            | ±              | -     | -             |               | -                      | -              | -             | -                | -                  | -               | +                         | +                   | 23    |
| nodular dolomite                             | 100.0  | TZ14-13 |              | ++           | +          | -                     | +                     | ±                   | -            | -              | -     | -             |               | -                      | -              | -             | -                | -                  | -               | ±                         | +                   | diag. |
| dolomite nodule                              | 96.0   |         | TZ16-15      | ++           | +          | +                     | ++                    | ±                   | ±            | ±              | -     | -             |               | -                      | -              | -             | -                | -                  | -               | ++                        | ++                  | diag. |
| laminated dolomite                           | 95.0   | TZ14-9  |              | +            | -          | +                     | +                     | +                   | ±            | ±              | -     | -             |               | ++                     | +              | +             | +                | +                  | -               | +                         | +                   | 25    |
| porous dolomite                              | 89.0   | TZ14-12 |              | +            | ±          | -                     | +                     | ±                   | -            | -              | -     | -             | Forams Biocl. | -                      | -              | -             | -                | +                  | ++              | +                         | +                   | 23    |
| nodular bed                                  | 80.0   |         | TZ16-13      | ++           | +          | +                     | +                     | ±                   | -            | -              | -     | -             | (+)           | -                      | -              | -             | -                | ±                  | +               | +                         | -                   | diag. |
| palaeosol, nodule                            | 79.0   |         | TZ16-12      | +            | ±          | ±                     | +                     | ±                   | -            | -              | -     | -             |               | -                      | -              | -             | -                | -                  | +               | ++                        | ++                  | ++    |
| sandy dolomite (congl.)                      | 75.0   | TZ14-5  | TZ16-11      | ++           | ±          | ±                     | ++                    | ±                   | ++           | -              | -     | +             | Ostracods (+) | -                      | -              | -             | -                | ±                  | ±               | -                         | -                   | 23    |
| sandstone                                    | 74.0   |         | TZ16-10      | +            | ±          | -                     | ++                    | -                   | -            | -              | -     | +             |               | -                      | -              | -             | -                | -                  | -               | -                         | -                   | 25    |
| brittle porous dolomite                      | 65.0   | TZ14-4  |              | +            | -          | +                     | ±                     | -                   | -            | ±              | +     | -             | Forams +      | (-)                    | +              | -             | -                | +                  | +               | +                         | +                   | 15    |
| porous dolomite                              | 43.0   |         | TZ16-7       | ++           | ±          | +                     | ±                     | ±                   | -            | -              | -     | -             | Ostracods ±   | -                      | -              | -             | -                | ±                  | +               | ++                        | +                   | 23    |
| nodules of dolomite                          | 35.0   | TZ14-3  |              | ++           | +          | -                     | -                     | ±                   | -            | -              | -     | -             |               | -                      | -              | -             | -                | -                  | -               | +                         | +                   | diag. |
| dolomite nodule                              | 35.0   | TZ14-2  |              | +            | ±          | -                     | -                     | ±                   | -            | -              | -     | -             |               | -                      | -              | -             | -                | -                  | -               | +                         | +                   | diag. |
| arenite                                      | 33.5   |         | TZ16-8       | +            | ±          | -                     | +                     | -                   | -            | ++             | -     | ++            |               | -                      | +              | -             | -                | -                  | -               | +                         | +                   | Sst.  |
| homogeneous dolomite                         | 33.0   |         | TZ14-1       | ++           | ±          | -                     | ±                     | +                   | -            | ±              | -     | ±             |               | ±                      | ±              | -             | -                | -                  | -               | +                         | +                   | 23    |
| laminated dolomite                           | 31.5   |         | TZ16-2       | +            | -          | -                     | +                     | -                   | -            | -              | -     | ++            |               | +                      | +              | -             | +                | +                  | -               | ±                         | ±                   | Sst.  |
| palaeosol, dolomite                          | 30.1   |         | TZ16-3       | ++           | -          | ±                     | +                     | ±                   | -            | -              | -     | -             |               | -                      | -              | -             | -                | -                  | -               | +                         | +                   | diag. |
| red mottled dolomite                         | 26.0   | TZ14-7  |              | -            | -          | -                     | ±                     | ±                   | -            | -              | -     | -             |               | -                      | -              | -             | ±                | -                  | -               | ±                         | ±                   | 23    |
| dolomite with clay                           | 21.0   | TZ14-8  |              | ++           | ±          | -                     | ±                     | ±                   | -            | -              | -     | -             |               | ±                      | -              | -             | -                | -                  | -               | -                         | -                   | 23    |
| homogeneous dolomite                         | 4.0    | TZ14-6  |              | ++           | +          | ±                     | +                     | ±                   | -            | ±              | -     | -             | Forams +      | +                      | +              | +             | +                | -                  | +               | +                         | ±                   | 25    |

- not present    ± rare    + common    ++ very abundant    (+) putative

\*\* Nodules are most likely diagenetic and can thus not be associated to a microfacies

\* Needs to be further subdivided into peloids, intraclasts, flat pebbles and clast of brittle deformation

Homogeneous dolomite    Laminated dolomite    Nodular dolomite    Oolitic dolomite    Sandstone

**Table 2**

| Sample | Depth<br>(m) | d(A°)   | Ca/(Ca+Mg)<br>(%) | 015/110 |
|--------|--------------|---------|-------------------|---------|
| TZ14-1 | 33.0         | 2.88944 | 51.1              | 0.44    |
| TZ14-7 | 43.0         | 2.88871 | 50.9              | 0.41    |
| TZ14-9 | 95.0         | 2.88633 | 50.1              | 0.46    |

**Table 3**

| Sample   | TC (wt%) | TOC (wt%) | TIC (wt%) |
|----------|----------|-----------|-----------|
| TZ16-1   | 0.06     | 0.05      | 0.02      |
| TZ16-19B | 0.12     | 0.11      | 0.02      |
| TZ16-5   | 0.16     | 0.05      | 0.12      |
| TZ16-19A | 0.34     | 0.10      | 0.25      |
| TZ16-14  | 0.42     | 0.16      | 0.27      |
| TZ16-18  | 0.50     | 0.07      | 0.43      |
| TZ16-16  | 0.51     | 0.05      | 0.46      |

**Table 4**

| Sample   | Depth<br>(m) | $\delta^{13}\text{C}$<br>(‰ VPDB) | $\delta^{18}\text{O}$<br>(‰ VPDB) | Type             | Description                        |
|----------|--------------|-----------------------------------|-----------------------------------|------------------|------------------------------------|
| TZ14-1   | 33           | 1.04                              | -0.76                             | homogeneous      | with siliciclastis                 |
| TZ14-3   | 35           | -1.58                             | -1.11                             | nodule           | with barite                        |
| TZ14-4   | 65           | -0.15                             | -0.22                             | peloidal         | with apatite                       |
| TZ14-6   | 4            | 2.90                              | -1.22                             | homogeneous      | with siderite and pyrite           |
| TZ14-8   | 21           | 3.73                              | -0.84                             | homogeneous      | with clay, apatite and Fe-oxide    |
| TZ14-9   | 95           | -1.01                             | 0.21                              | laminated        | with celestine and barite          |
| TZ14-10b | 107          | -1.05                             | 0.26                              | laminated        | with apatite and pyrite            |
| TZ14-11  | 111          | 0.79                              | 0.64                              | homogeneous      | homog. lamina with clay and pyrite |
| TZ14-12  | 89           | -0.15                             | 0.36                              | peloidal         | with megalodont and Ti-oxides      |
| TZ14-13  | 100          | -3.38                             | 0.23                              | nodule           | palaeosol with Fe-oxide            |
| TZ16-St1 | 104          | -2.74                             | 0.38                              | homogeneous      | mud clast top                      |
|          | 104          | -2.71                             | 0.34                              | homogeneous      | matrix                             |
| TZ16-St2 | 105          | -3.08                             | 0.12                              | nodule           | matrix top                         |
|          | 105          | -2.86                             | 0.22                              | nodule           | matrix bottom                      |
| TZ16-7   | 43           | -2.91                             | -0.36                             | <i>Rauhwacke</i> | matrix top                         |
|          | 43           | -2.11                             | -0.67                             | <i>Rauhwacke</i> | matrix bottom                      |
| TZ16-13  | 80           | -2.03                             | 0.15                              | nodule           | matrix top                         |
|          | 80           | -1.94                             | 0.01                              | nodule           | matrix bottom                      |
| TZ16-21  | 107          | -0.86                             | 0.18                              | laminated        | graded lamina                      |
|          | 107          | -1.09                             | 0.17                              | laminated        | light lamina                       |
|          | 107          | -0.88                             | 0.23                              | laminated        | dark lamina                        |
| TZ16-22  | 120          | 1.72                              | 0.45                              | homogeneous      | mud clast                          |
|          | 120          | 1.22                              | 0.15                              | homogeneous      | lamination                         |
|          | 120          | 2.97                              | 0.54                              | homogeneous      | homogeneous part                   |
| TZ16-St3 | 107          | -1.07                             | 0.34                              | laminated        | dark layer, lense                  |
|          | 107          | -1.00                             | 0.07                              | laminated        | dark layer bottom                  |
|          | 107          | -1.18                             | 0.28                              | laminated        | dark layer top                     |
|          | 107          | -1.12                             | 0.06                              | laminated        | light layer top                    |

**Table 5**

| Sample                       | Element     | 0.1 N acetic acid fraction |                     |                   |                    | 1 N acetic acid fraction |                     |                   | 1 N HCl fraction  |                     |
|------------------------------|-------------|----------------------------|---------------------|-------------------|--------------------|--------------------------|---------------------|-------------------|-------------------|---------------------|
|                              |             | μmol/g                     | μmol/g              | μmol/g            | μmol/g             | μmol/g                   | μmol/g              | μmol/g            | μmol/g            | μmol/g              |
| <b>Bulk dolomite samples</b> |             |                            |                     |                   |                    |                          |                     |                   |                   |                     |
|                              |             | TZ14-1<br>0.098 g          | TZ14-7<br>0.127 g   | TZ14-9<br>0.099 g | crystal<br>0.094 g | TZ14-1<br>0.098 g        | TZ14-7<br>0.127 g   | TZ14-9<br>0.099 g |                   |                     |
|                              | Al          | 6.58                       | 3.17                | 11.57             | 3.04               | 4.51                     | 8.17                | 5.97              |                   |                     |
|                              | Ca (mmol/g) | 1.68                       | 2.33                | 1.88              | 2.50               | 2.87                     | 2.71                | 2.75              |                   |                     |
|                              | Fe          | 4.97                       | 3.53                | 10.67             | 34.27              | 2.04                     | 9.15                | 5.02              |                   |                     |
|                              | K           | 3.32                       | 9.71                | 5.26              | 0.93               | 10.31                    | 4.65                | 13.51             |                   |                     |
|                              | Mg (mmol/g) | 1.61                       | 2.13                | 1.77              | 2.34               | 2.64                     | 2.48                | 2.50              |                   |                     |
|                              | Mn          | 5.96                       | 3.57                | 7.68              | 15.24              | 10.84                    | 3.72                | 10.67             |                   |                     |
|                              | Na          | 12.78                      | 18.98               | 17.32             | 1.85               | 17.35                    | 20.12               | 23.30             |                   |                     |
|                              | P           | 1.50                       | n.d.                | 0.98              | n.d.               | 0.20                     | 1.45                | n.d.              |                   |                     |
|                              | Ti          | n.d.                       | n.d.                | n.d.              | n.d.               | n.d.                     | n.d.                | n.d.              |                   |                     |
|                              | Ba          | 0.50                       | 0.03                | 0.48              | n.d.               | 1.75                     | 0.02                | 1.03              |                   |                     |
|                              | Sr          | 0.38                       | 1.00                | 1.16              | 0.13               | 0.79                     | 0.57                | 34.91             |                   |                     |
|                              | Rb          | n.d.                       | n.d.                | n.d.              | n.d.               | n.d.                     | n.d.                | n.d.              |                   |                     |
| <b>Clay samples</b>          |             |                            |                     |                   |                    |                          |                     |                   |                   |                     |
|                              |             | TZ16-1<br>0.038 g          | TZ16-19B<br>0.030 g |                   |                    | TZ16-1<br>0.038 g        | TZ16-19B<br>0.030 g |                   | TZ16-1<br>0.038 g | TZ16-19B<br>0.030 g |
|                              | Al          | 2.18                       | 4.52                |                   |                    | 1.54                     | 4.01                |                   | 39.86             | 33.62               |
|                              | Ca          | 19.14                      | 11.62               |                   |                    | 8.48                     | 4.34                |                   | 0.71              | 0.60                |
|                              | Fe          | 0.72                       | 1.79                |                   |                    | 0.83                     | 2.25                |                   | 75.59             | 11.56               |
|                              | K           | 4.97                       | 9.02                |                   |                    | 2.77                     | 3.69                |                   | 11.69             | 12.61               |
|                              | Mg          | 8.05                       | 13.76               |                   |                    | 4.46                     | 6.07                |                   | 24.62             | 18.75               |
|                              | Mn          | n.d.                       | n.d.                |                   |                    | n.d.                     | n.d.                |                   | n.d.              | n.d.                |
|                              | Na          | 0.355                      | 0.470               |                   |                    | 0.305                    | 0.389               |                   | 0.531             | 0.828               |
|                              | P           | 6.89                       | 1.08                |                   |                    | 0.67                     | n.d.                |                   | n.d.              | n.d.                |
|                              | Ti          | n.d.                       | n.d.                |                   |                    | n.d.                     | n.d.                |                   | 1.305             | 0.194               |
|                              | Ba          | n.d.                       | n.d.                |                   |                    | n.d.                     | n.d.                |                   | 0.022             | n.d.                |
|                              | Sr          | 0.417                      | 0.047               |                   |                    | 0.187                    | 0.018               |                   | 0.017             | 0.005               |
|                              | Rb          | n.d.                       | n.d.                |                   |                    | n.d.                     | n.d.                |                   | n.d.              | n.d.                |



**Table 6. Sr-isotopes**

| Sample                                               | Section (m) | Description                                        | Seq. extr. | Weight (mg) | Reagent   | Amount (ml) | Extr. T (°C) | Extr. time  | Shaker y/n | Washing (before step)                                 | Run no.  | <sup>87</sup> Sr/ <sup>86</sup> Sr | 2σ (10 <sup>-4</sup> ) | Aliquot for conc. |
|------------------------------------------------------|-------------|----------------------------------------------------|------------|-------------|-----------|-------------|--------------|-------------|------------|-------------------------------------------------------|----------|------------------------------------|------------------------|-------------------|
| NBS987                                               |             | Standard solution (500 ppm)                        |            | 500 ng      |           |             |              |             |            |                                                       | (n = 40) | 0.710272                           | 4                      |                   |
| NBS988                                               |             | Standard solution (500 ppm)                        |            | 500 ng      |           |             |              |             |            |                                                       | (n = 9)  | 0.710268                           | 6                      |                   |
| <b>Test minerals</b>                                 |             |                                                    |            |             |           |             |              |             |            |                                                       |          |                                    |                        |                   |
| <i>Series 1 (sequential extraction)</i>              |             |                                                    |            |             |           |             |              |             |            |                                                       |          |                                    |                        |                   |
| Celestine                                            |             |                                                    |            | 2.34        | 1M NaCl   | 2 ml        | 20           | 12 h        | n          | 1M NaCl                                               | 6052     | 0.708037                           | 5                      |                   |
| Barite                                               |             |                                                    |            | 25.09       | 0.1N AcOH | 2 ml        | 20           | 12 h        | n          | 3M NaCl, 1M KCl, H <sub>2</sub> O, 0.1N AcOH          | 6109     | 0.708887                           | 9                      |                   |
| Dolomite                                             |             |                                                    |            | 9.88        | 0.1N AcOH | 2 ml        | 20           | 12 h        | n          | 3M NaCl, 1M KCl, H <sub>2</sub> O, 0.1N AcOH          | 6110     | 0.709942                           | 11                     |                   |
| Mixture                                              |             | Barite 4.5 mg; Celestine 8.91 mg; Dolomite 35.9 mg | seq.       | 49.31       | 1M NaCl   | 2 ml        | 20           | 12 h        | n          | 0.1N AcOH, 1M NaCl                                    | 6053     | 0.708038                           | 3                      |                   |
| Mixture                                              |             |                                                    | seq.       | -           | 0.1N AcOH | 2 ml        | 20           | 12 h        | n          | 3M NaCl, 1M KCl, H <sub>2</sub> O, 0.1N AcOH          | 6108     | 0.709501                           | 40                     |                   |
| <i>Series 2</i>                                      |             |                                                    |            |             |           |             |              |             |            |                                                       |          |                                    |                        |                   |
| Celestine                                            |             |                                                    |            | 2.22        | 1M NaCl   | 2 ml        | 20           | 2 h         | n          | -                                                     | 6121     | 0.708045                           | 4                      |                   |
| Celestine                                            |             |                                                    |            | 4.60        | 0.1N AcOH | 2 ml        | 20           | 4 h         | n          | 12h 1M NaCl                                           | 6132     | 0.708047                           | 3                      |                   |
| Barite                                               |             |                                                    |            | 36.94       | 6N HCl    | 2 ml        | 40           | 12 h        | n          | -                                                     | 6152     | 0.707610                           | 5                      |                   |
| Barite                                               |             |                                                    | seq.       | -           | 6N HCl    | 2 ml        | 40           | 12 h        | n          | -                                                     | 6155     | 0.707564                           | 6                      |                   |
| Dolomite                                             |             |                                                    |            | 17.37       | 0.1N AcOH | 5 ml        | 40           | 12 h        | n          | -                                                     | 6068     | 0.710831                           | 7                      |                   |
| Dolomite                                             |             | Replicate                                          |            | 3.41        | 0.1N AcOH | 2 ml        | 40           | 12 h        | n          | -                                                     | 6114     | 0.710557                           | 11                     |                   |
| <b>Travenanzes Fm.</b>                               |             |                                                    |            |             |           |             |              |             |            |                                                       |          |                                    |                        |                   |
| <i>Bulk samples sequential extractions, Series 1</i> |             |                                                    |            |             |           |             |              |             |            |                                                       |          |                                    |                        |                   |
| TZ14-1                                               | 33 m        | homogeneous dolomite                               | seq.       | 12.35       | 1M NaCl   | 2 ml        | 20           | 12 h        | n          | -                                                     | 6112     | 0.708125                           | 12                     |                   |
| TZ14-1                                               | 33 m        | homogeneous dolomite                               | seq.       | -           | 0.1N AcOH | 3 x 2 ml    | 20           | 4h, 12h, 4h | y          | 1M NaCl, H <sub>2</sub> O, 3.3M KCl, H <sub>2</sub> O | 6169     | 0.707666                           | 4                      |                   |
| TZ14-1                                               | 33 m        | homogeneous dolomite                               | seq.       | -           | 0.1N AcOH | 2 ml        | 20           | 36 h        | y          | -                                                     | 6173     | 0.715417                           | 250                    |                   |
| TZ14-9                                               | 95 m        | laminated dolomite                                 | seq.       | 13.50       | 1M NaCl   | 2 ml        | 20           | 12 h        | n          | -                                                     | 6113     | 0.707880                           | 4                      |                   |
| TZ14-9                                               | 95 m        | laminated dolomite                                 | seq.       | -           | 0.1N AcOH | 3 x 2 ml    | 20           | 4h, 12h, 4h | y          | 1M NaCl, H <sub>2</sub> O, 3.3M KCl, H <sub>2</sub> O | 6171     | 0.707817                           | 5                      |                   |
| TZ14-9                                               | 95 m        | laminated dolomite                                 | seq.       | -           | 0.1N AcOH | 2 ml        | 20           | 36 h        | y          | -                                                     | 6174     | 0.719226                           | 455                    |                   |
| Mixture                                              |             | Residue from test mineral series 1                 | seq.       | -           | 0.1N AcOH | 3 x 2 ml    | 20           | 4h, 12h, 4h | y          | 1M NaCl, H <sub>2</sub> O, 3.3M KCl, H <sub>2</sub> O | 6172     | 0.709812                           | 5                      |                   |
| Mixture                                              |             | Residue from test mineral series 1                 | seq.       | -           | 0.1N AcOH | 2 ml        | 20           | 36 h        | y          | -                                                     | 6176     | 0.709900                           | 4                      |                   |
| TZ14-1                                               | 33 m        | homogeneous dolomite                               |            | 42.76       | 0.1N AcOH | 2 ml        | 20           | 4 h         | n          | -                                                     | 6130     | 0.707894                           | 4                      |                   |
| TZ14-9                                               | 95 m        | laminated dolomite                                 |            | 17.69       | 0.1N AcOH | 2 ml        | 20           | 4 h         | n          | -                                                     | 6131     | 0.707872                           | 5                      |                   |
| <i>Bulk samples sequential extractions, Series 2</i> |             |                                                    |            |             |           |             |              |             |            |                                                       |          |                                    |                        |                   |
| TZ14-1                                               | 33 m        | homogeneous dolomite                               |            | 93.91       | 1M NaCl   | 10 ml       | 20           | 12 h        | y          | -                                                     | 6182     | 0.708096                           | 5                      |                   |
| TZ14-1                                               | 33 m        | homogeneous dolomite                               | seq.       | 98.28       | 0.1N AcOH | 10 ml       | 20           | 12 h        | y          | -                                                     | 6183     | 0.707812                           | 4                      | yes               |
| TZ14-1                                               | 33 m        | homogeneous dolomite                               | seq.       | -           | 1N AcOH   | 10 ml       | 20           | 12 h        | y          | -                                                     | 6205     | 0.707670                           | 5                      | yes               |
| TZ14-1                                               | 33 m        | homogeneous dolomite                               |            | 50.00       | 6N HCl    | 5 ml        | 20           | 12 h        | n          | 10h 1N CH <sub>3</sub> COOH                           | 6445     | 0.710403                           | 6                      |                   |
| TZ14-7                                               | 26 m        | mottled dolomite                                   |            | 90.64       | 1M NaCl   | 10 ml       | 20           | 12 h        | y          | -                                                     | 6179     | 0.707883                           | 4                      |                   |
| TZ14-7                                               | 26 m        | mottled dolomite                                   | seq.       | 127.52      | 0.1N AcOH | 10 ml       | 20           | 12 h        | y          | -                                                     | 6178     | 0.707801                           | 4                      | yes               |
| TZ14-7                                               | 26 m        | mottled dolomite                                   | seq.       | -           | 1N AcOH   | 10 ml       | 20           | 12 h        | y          | -                                                     | 6207     | 0.707719                           | 4                      | yes               |
| TZ14-7                                               | 26 m        | mottled dolomite                                   |            | 50.00       | 6N HCl    | 5 ml        | 20           | 12 h        | n          | 10h 1N CH <sub>3</sub> COOH                           | 6449     | 0.730453                           | 5                      |                   |
| TZ14-9                                               | 95 m        | laminated dolomite                                 |            | 97.82       | 1M NaCl   | 10 ml       | 20           | 12 h        | y          | -                                                     | 6187     | 0.707869                           | 3                      |                   |
| TZ14-9                                               | 95 m        | laminated dolomite                                 | seq.       | 98.76       | 0.1N AcOH | 10 ml       | 20           | 12 h        | y          | -                                                     | 6185     | 0.707862                           | 3                      | yes               |
| TZ14-9                                               | 95 m        | laminated dolomite                                 | seq.       | -           | 1N AcOH   | 10 ml       | 20           | 12 h        | y          | -                                                     | 6206     | 0.707813                           | 3                      | yes               |
| TZ14-9                                               | 95 m        | laminated dolomite                                 |            | 50.00       | 6N HCl    | 5 ml        | 20           | 12 h        | n          | 10h 1N CH <sub>3</sub> COOH                           | 6447     | 0.708464                           | 4                      |                   |
| Dolomite (single crystal)                            | control     |                                                    |            | 116.65      | 1M NaCl   | 10 ml       | 20           | 12 h        | y          | -                                                     | 6184     | 0.708401                           | 40                     |                   |
| Dolomite (single crystal)                            | control     |                                                    | seq.       | 94.12       | 0.1N AcOH | 10 ml       | 20           | 12 h        | y          | -                                                     | 6180     | 0.707735                           | 6                      | yes               |
| Dolomite (single crystal)                            | control     |                                                    | seq.       | -           | 1N AcOH   | 10 ml       | 20           | 12 h        | y          | -                                                     | 6208     | 0.707666                           | 6                      | yes               |
| <i>Micro-drill samples</i>                           |             |                                                    |            |             |           |             |              |             |            |                                                       |          |                                    |                        |                   |
| TZ14-3                                               | 35 m        | dolomite nodule                                    |            | -           | 0.1N AcOH | 2 ml        | 20           | 24 h        | n          | H <sub>2</sub> O, 5min 0.1N AcOH                      | 6548     | 0.707976                           | 4                      |                   |
| TZ14-4                                               | 65 m        | peloidal dolomite                                  |            | -           | 0.1N AcOH | 2 ml        | 20           | 24 h        | n          | H <sub>2</sub> O, 5min 0.1N AcOH                      | 6549     | 0.707711                           | 4                      |                   |
| TZ14-6                                               | 4 m         | homogeneous dolomite                               |            | -           | 0.1N AcOH | 2 ml        | 20           | 24 h        | n          | H <sub>2</sub> O, 5min 0.1N AcOH                      | 6550     | 0.707830                           | 4                      |                   |
| TZ14-8                                               | 21 m        | dolomite with clay                                 |            | -           | 0.1N AcOH | 2 ml        | 20           | 24 h        | n          | H <sub>2</sub> O, 5min 0.1N AcOH                      | 6551     | 0.707821                           | 4                      |                   |
| TZ14-10b                                             | 107 m       | laminated dolomite                                 |            | -           | 0.1N AcOH | 2 ml        | 20           | 24 h        | n          | H <sub>2</sub> O, 5min 0.1N AcOH                      | 6554     | 0.707886                           | 4                      |                   |
| TZ14-11                                              | 111 m       | laminated dolomite                                 |            | -           | 0.1N AcOH | 2 ml        | 20           | 24 h        | n          | H <sub>2</sub> O, 5min 0.1N AcOH                      | 6553     | 0.707787                           | 4                      |                   |
| TZ14-12                                              | 89 m        | peloidal dolomite                                  |            | -           | 0.1N AcOH | 2 ml        | 20           | 24 h        | n          | H <sub>2</sub> O, 5min 0.1N AcOH                      | 6555     | 0.707848                           | 4                      |                   |
| TZ14-13                                              | 100 m       | dolomite with palaeosol                            |            | -           | 0.1N AcOH | 2 ml        | 20           | 24 h        | n          | H <sub>2</sub> O, 5min 0.1N AcOH                      | 6556     | 0.707872                           | 4                      |                   |
| <i>Micro-drilled sequential extractions</i>          |             |                                                    |            |             |           |             |              |             |            |                                                       |          |                                    |                        |                   |
| TZ14-1                                               | 33 m        | homogeneous dolomite                               | seq.       | -           | 0.1N AcOH | 2 ml        | 20           | 24 h        | n          | H <sub>2</sub> O, 5min 0.1N AcOH                      | 6411     | 0.707672                           | 3                      |                   |
| TZ14-1                                               | 33 m        | homogeneous dolomite                               | seq.       | -           | 1N AcOH   | 2 ml        | 20           | 24 h        | n          | H <sub>2</sub> O, 5min 0.1N AcOH                      | 6448     | 0.708300                           | 23                     |                   |
| TZ14-7                                               | 26 m        | mottled dolomite                                   | seq.       | -           | 0.1N AcOH | 2 ml        | 20           | 24 h        | n          | H <sub>2</sub> O, 5min 0.1N AcOH                      | 6479     | 0.707775                           | 6                      |                   |
| TZ14-7                                               | 26 m        | mottled dolomite                                   | seq.       | -           | 1N AcOH   | 2 ml        | 20           | 24 h        | n          | H <sub>2</sub> O, 5min 0.1N AcOH                      | 6444     | 0.708502                           | 22                     |                   |
| TZ14-7                                               | 26 m        | clay layer                                         | seq.       | -           | 0.1N AcOH | 2 ml        | 20           | 24 h        | n          | H <sub>2</sub> O, 5min 0.1N AcOH                      | 6410     | 0.707742                           | 4                      |                   |
| TZ14-7                                               | 26 m        | clay layer                                         | seq.       | -           | 1N AcOH   | 2 ml        | 20           | 24 h        | n          | H <sub>2</sub> O, 5min 0.1N AcOH                      | 6446     | 0.708467                           | 2                      |                   |
| TZ14-9                                               | 95 m        | laminated dolomite                                 | seq.       | -           | 0.1N AcOH | 2 ml        | 20           | 24 h        | n          | H <sub>2</sub> O, 5min 0.1N AcOH                      | 6412     | 0.707813                           | 149                    |                   |
| TZ14-9                                               | 95 m        | laminated dolomite                                 | seq.       | -           | 1N AcOH   | 2 ml        | 20           | 24 h        | n          | H <sub>2</sub> O, 5min 0.1N AcOH                      | 6443     | 0.708281                           | 56                     |                   |
| <i>Clay samples</i>                                  |             |                                                    |            |             |           |             |              |             |            |                                                       |          |                                    |                        |                   |
| TZ16-1                                               | 32 m        | red (green) clay                                   | seq.       | 38.30       | 0.1N AcOH | 2 ml        | 20           | 12 h        | n          | 2h 0.1N AcOH                                          | 6557     | 0.707771                           | 4                      | yes               |
| TZ16-1                                               | 32 m        | red (green) clay                                   | seq.       | -           | 1N AcOH   | 2 ml        | 20           | 12 h        | n          | 2h 1N AcOH                                            | 6558     | 0.707768                           | 4                      | yes               |
| TZ16-1                                               | 32 m        | red (green) clay                                   | seq.       | -           | 6N HCl    | 2 ml        | 20           | 12 h        | n          | 4h 6N HCl                                             | 6559     | 0.722998                           | 18                     | yes               |
| TZ16-19B                                             | 110 m       | dark grey clay                                     | seq.       | 29.74       | 0.1N AcOH | 2 ml        | 20           | 12 h        | n          | 2h 0.1N AcOH                                          | 6560     | 0.708299                           | 8                      | yes               |
| TZ16-19B                                             | 110 m       | dark grey clay                                     | seq.       | -           | 1N AcOH   | 2 ml        | 20           | 12 h        | n          | 2h 1N AcOH                                            | 6561     | 0.708582                           | 8                      | yes               |
| TZ16-19B                                             | 110 m       | dark grey clay                                     | seq.       | -           | 6N HCl    | 2 ml        | 20           | 12 h        | n          | 4h 6N HCl                                             | 6562     | 0.733910                           | 24                     | yes               |
| <b>Germanic Keuper</b>                               |             |                                                    |            |             |           |             |              |             |            |                                                       |          |                                    |                        |                   |
| Lehr                                                 |             | micro-drilled                                      |            | -           | 0.1N AcOH | 2 ml        | 20           | 24 h        | n          | H <sub>2</sub> O, 5min 0.1N AcOH                      | 6545     | 0.709303                           | 4                      |                   |
| Keu 1-2 B                                            |             | micro-drilled                                      |            | -           | 0.1N AcOH | 2 ml        | 20           | 24 h        | n          | H <sub>2</sub> O, 5min 0.1N AcOH                      | 6546     | 0.709805                           | 6                      |                   |
| <b>Deep Springs Lake</b>                             |             |                                                    |            |             |           |             |              |             |            |                                                       |          |                                    |                        |                   |
| DS11-3, 16.5                                         | 16.5 cm     | dried mud                                          | seq.       | 91.17       | 0.1N AcOH | 10 ml       | 20           | 5 min       | n          | H <sub>2</sub> O                                      | 6363     | 0.713207                           | 4                      |                   |
| DS11-3, 16.5                                         | 16.5 cm     | dried mud                                          | seq.       | -           | 0.1N AcOH | 10 ml       | 20           | 10 h        | n          | H <sub>2</sub> O                                      | 6363     | 0.713086                           | 4                      |                   |
| DS11-3, 52.5                                         | 52.5 cm     | dried mud                                          |            | 62.19       | 0.1N AcOH | 10 ml       | 20           | 10 h        | n          | H <sub>2</sub> O                                      | 6343     | 0.713035                           | 4                      |                   |
| <b>Milne Lake (Coorong)</b>                          |             |                                                    |            |             |           |             |              |             |            |                                                       |          |                                    |                        |                   |
| CM01-3                                               | 30 cm       | dried mud, ground                                  | seq.       | 47.94       | 0.1N AcOH | 10 ml       | 20           | 5 min       | n          | H <sub>2</sub> O                                      | 6340     | 0.709251                           | 4                      |                   |
| CM01-3                                               | 30 cm       | dried mud, ground                                  | seq.       | -           | 0.1N AcOH | 10 ml       | 20           | 10 h        | n          | H <sub>2</sub> O                                      | 6340     | 0.709275                           | 3                      |                   |
| CM01-9                                               | 90 cm       | dried mud, ground                                  |            | 52.47       | 0.1N AcOH | 10 ml       | 20           | 10 h        | n          | H <sub>2</sub> O                                      | 6341     | 0.709272                           | 4                      |                   |
